# Supplementary material for: Additional bioactive guanidine alkaloids from the Mediterranean sponge Crambe crambe
Source: Royal Society of Chemistry journal article supplement (doi:10.1039/c2ra00045h), 2012-01-01
Supplement: c2ra00045h.pdf [file c2ra00045h.pdf]

† Electronic Supplementary Information (ESI) for Organic & Biomolecular Chemistry DOI: 10.1039/b000000x/

## Supplementary material

### Additional bioactive guanidine alkaloids from the Mediterranean sponge *Crambe crambe*

Stéphanie Bondu, Grégory Genta-Jouve, Marta Leirós, Carmen Valle, Jean-Marie Guignonis, Luis M. Botana, and Olivier P. Thomas\*

E-mail: [olivier.thomas@unice.fr](mailto:olivier.thomas@unice.fr)

#### NMR spectra

|                                                                          |      |
|--------------------------------------------------------------------------|------|
| <b>Crambescin A2 (1)</b>                                                 |      |
| <sup>1</sup> H NMR spectrum (500 MHz, CD3OD)                             | S-2  |
| <sup>13</sup> C NMR spectrum (125 MHz, CD3OD)                            | S-3  |
| <sup>1</sup> H- <sup>1</sup> H COSY spectrum (500 MHz, CD3OD)            | S-4  |
| <b>Crambescin A1 (4)</b>                                                 |      |
| <sup>1</sup> H NMR spectrum (500 MHz, CD3OD)                             | S-5  |
| <sup>13</sup> C NMR spectrum (125 MHz, CD3OD)                            | S-6  |
| <sup>1</sup> H- <sup>1</sup> H COSY spectrum (500 MHz, CD3OD)            | S-7  |
| <b>Didehydrocrambescin A1 (5)</b>                                        |      |
| <sup>1</sup> H NMR spectrum (500 MHz, CD3OD)                             | S-8  |
| <sup>1</sup> H- <sup>1</sup> H COSY spectrum (500 MHz, CD3OD)            | S-9  |
| <b>Crambescin B1 (7)</b>                                                 |      |
| <sup>1</sup> H NMR spectrum (500 MHz, CD3OD)                             | S-10 |
| <sup>13</sup> C NMR spectrum (125 MHz, CD3OD)                            | S-11 |
| <sup>1</sup> H- <sup>1</sup> H COSY spectrum (500 MHz, CD3OD)            | S-12 |
| <b>Crambescin C1 (10)</b>                                                |      |
| <sup>1</sup> H NMR spectrum (500 MHz, CD3OD)                             | S-13 |
| <sup>1</sup> H- <sup>1</sup> H COSY spectrum (500 MHz, CD3OD)            | S-14 |
| <sup>1</sup> H- <sup>13</sup> C HMBC spectrum (500 MHz, CD3OD)           | S-15 |
| <sup>1</sup> H NMR spectra of crambescins A2 (1-3) and crambescin A1 (4) | S-16 |
| <sup>1</sup> H NMR spectra of crambescins B2 (6-8)                       | S-16 |
| <sup>1</sup> H NMR spectra of crambescins C1 (9-11)                      | S-17 |
| <sup>1</sup> H NMR spectrum of crambescidine 816 (12)                    | S-18 |
| <sup>13</sup> C NMR spectrum of crambescidine 816 (12)                   | S-19 |

#### HRMS/MS data

|                                                      |      |
|------------------------------------------------------|------|
| HRMS/MS spectra of <b>crambescin A2 (1)</b>          | S-20 |
| HRMS/MS spectra of <b>crambescin A2 (2)</b>          | S-20 |
| HRMS/MS spectra of <b>crambescin A2 (3)</b>          | S-21 |
| HRMS/MS spectra of <b>crambescin A1 (4)</b>          | S-21 |
| HRMS/MS spectra of <b>didehydrocrambescin A1 (5)</b> | S-22 |
| HRMS/MS spectra of <b>crambescin B1 (6)</b>          | S-22 |
| HRMS/MS spectra of <b>crambescin B1 (7)</b>          | S-23 |
| HRMS/MS spectra of <b>crambescin B1 (8)</b>          | S-23 |
| HRMS/MS spectra of <b>crambescin C1 (9)</b>          | S-24 |
| HRMS/MS spectra of <b>crambescin C1 (10)</b>         | S-24 |
| HRMS/MS spectra of <b>crambescin C1 (11)</b>         | S-25 |

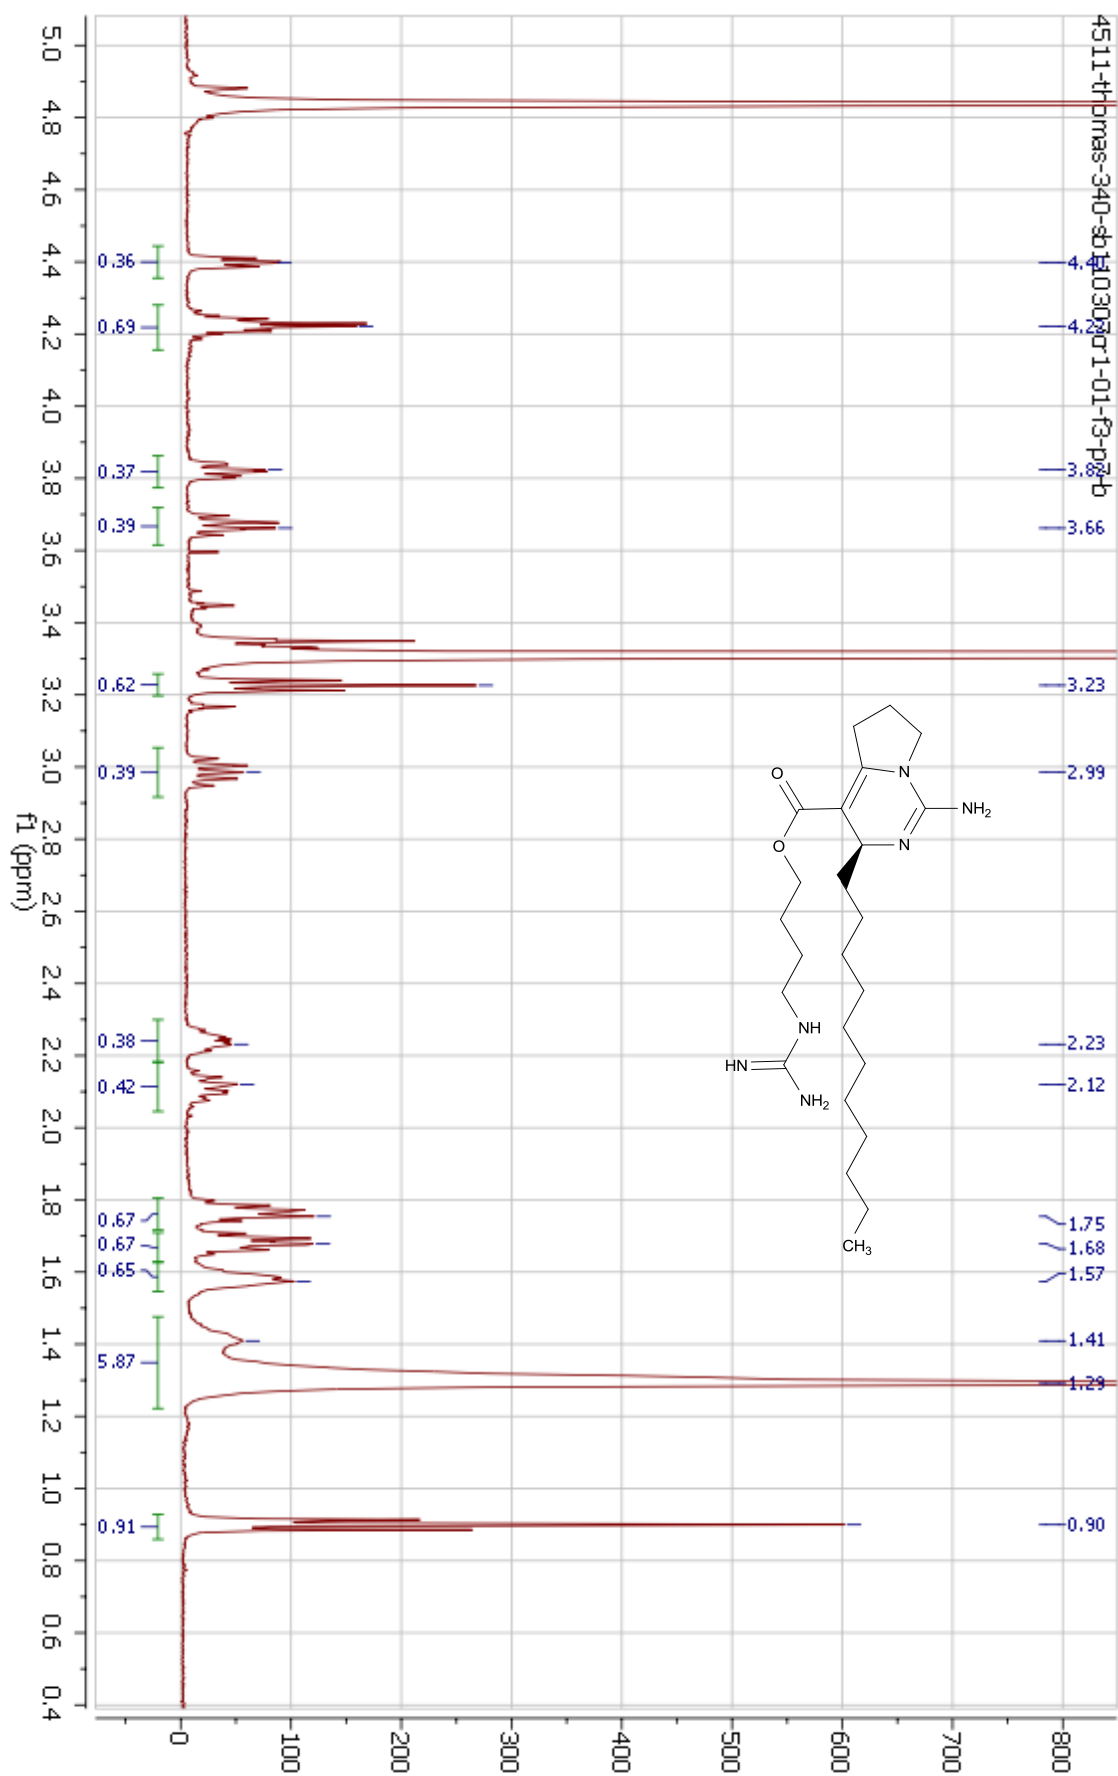

<sup>1</sup>H NMR spectrum (500 MHz, CD<sub>3</sub>OD) of crambescin A2 (1)

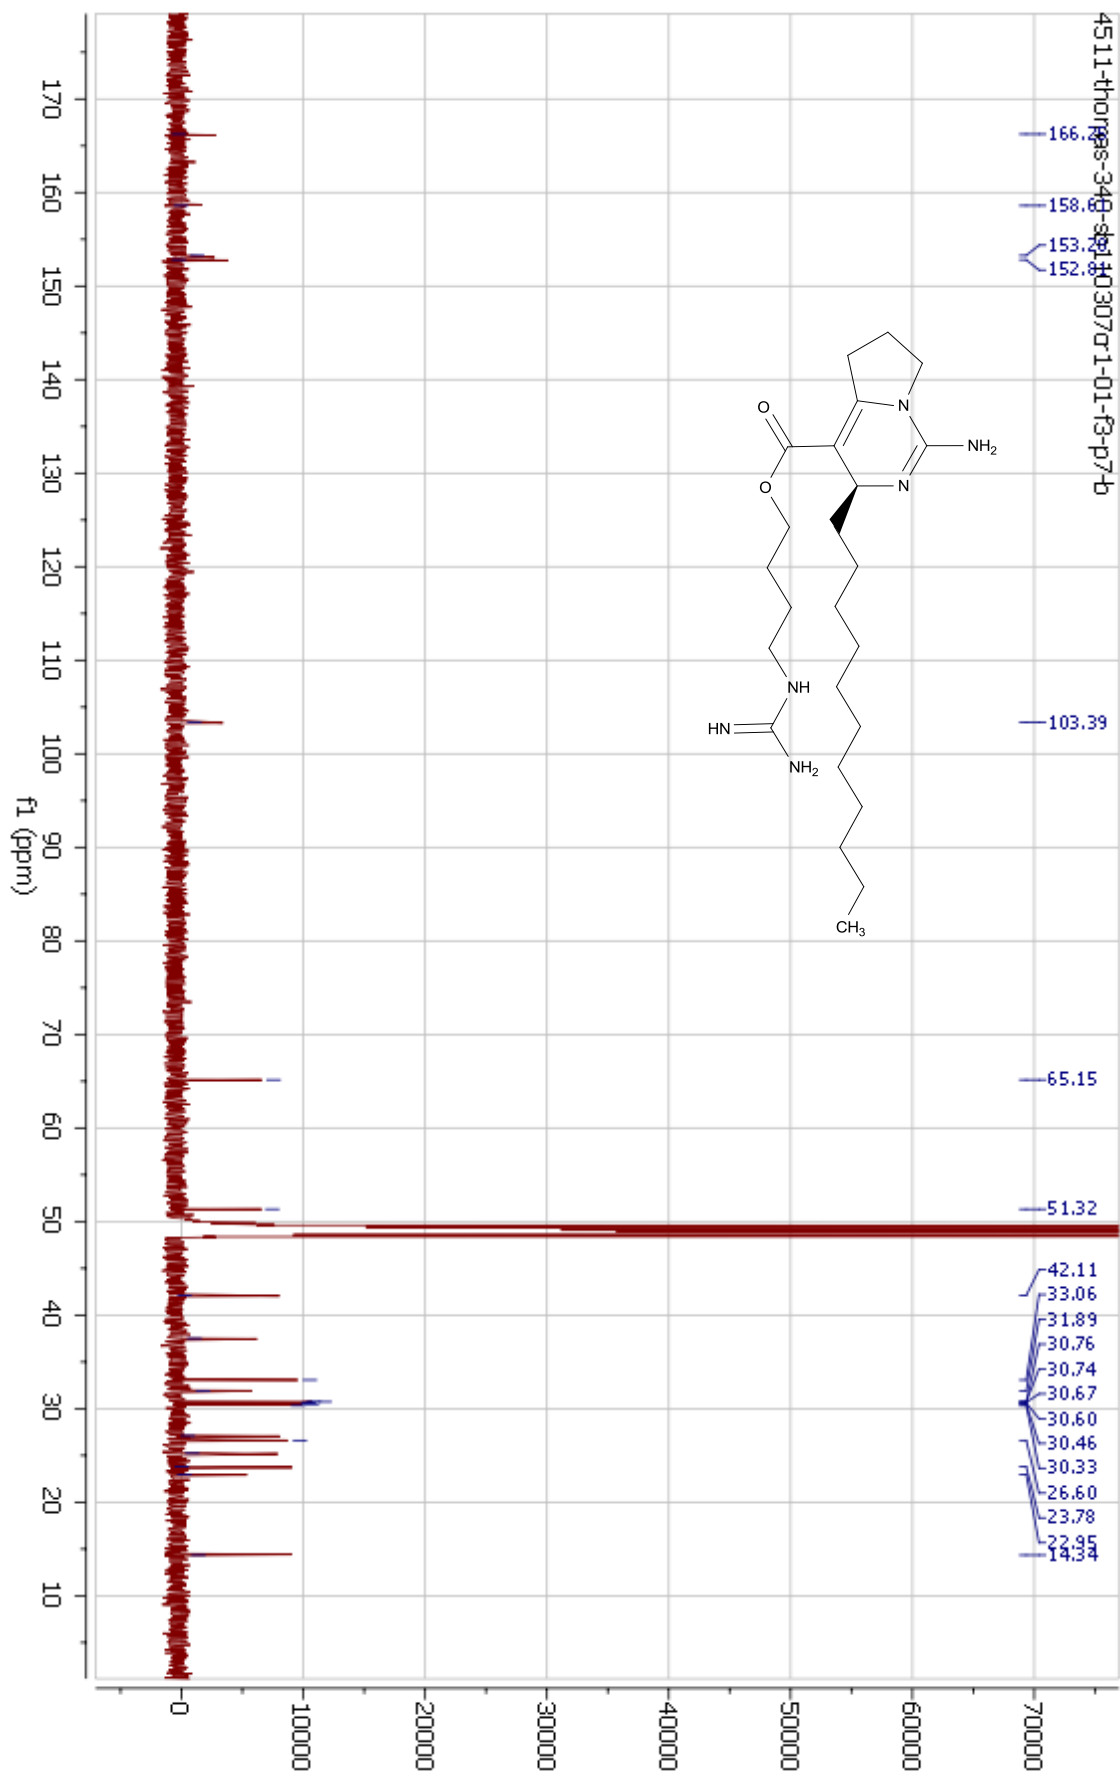

<sup>13</sup>C NMR spectrum (125 MHz, CD<sub>3</sub>OD) of crambescin A2 (1)

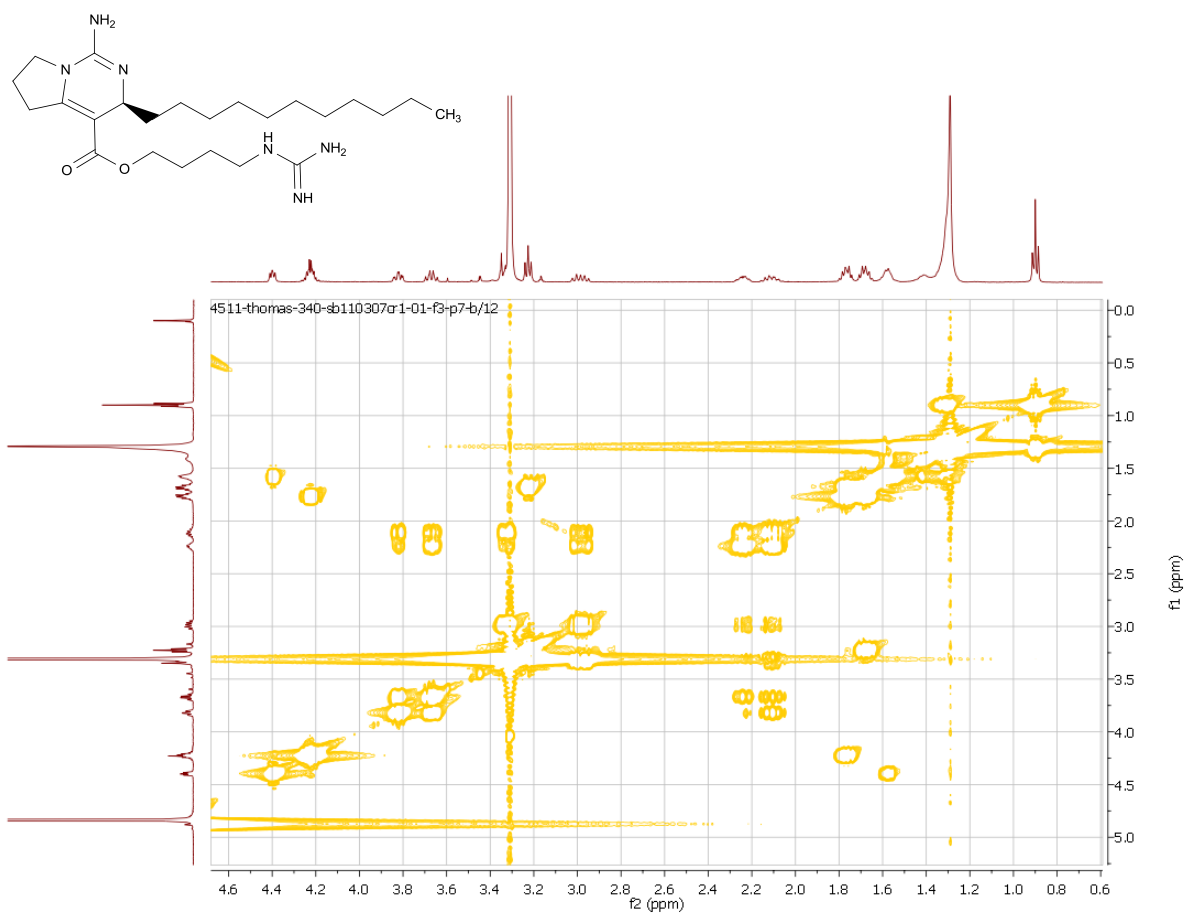

$^1\text{H}$ - $^1\text{H}$  COSY spectrum (500 MHz,  $\text{CD}_3\text{OD}$ ) of crambescin A2 (1)



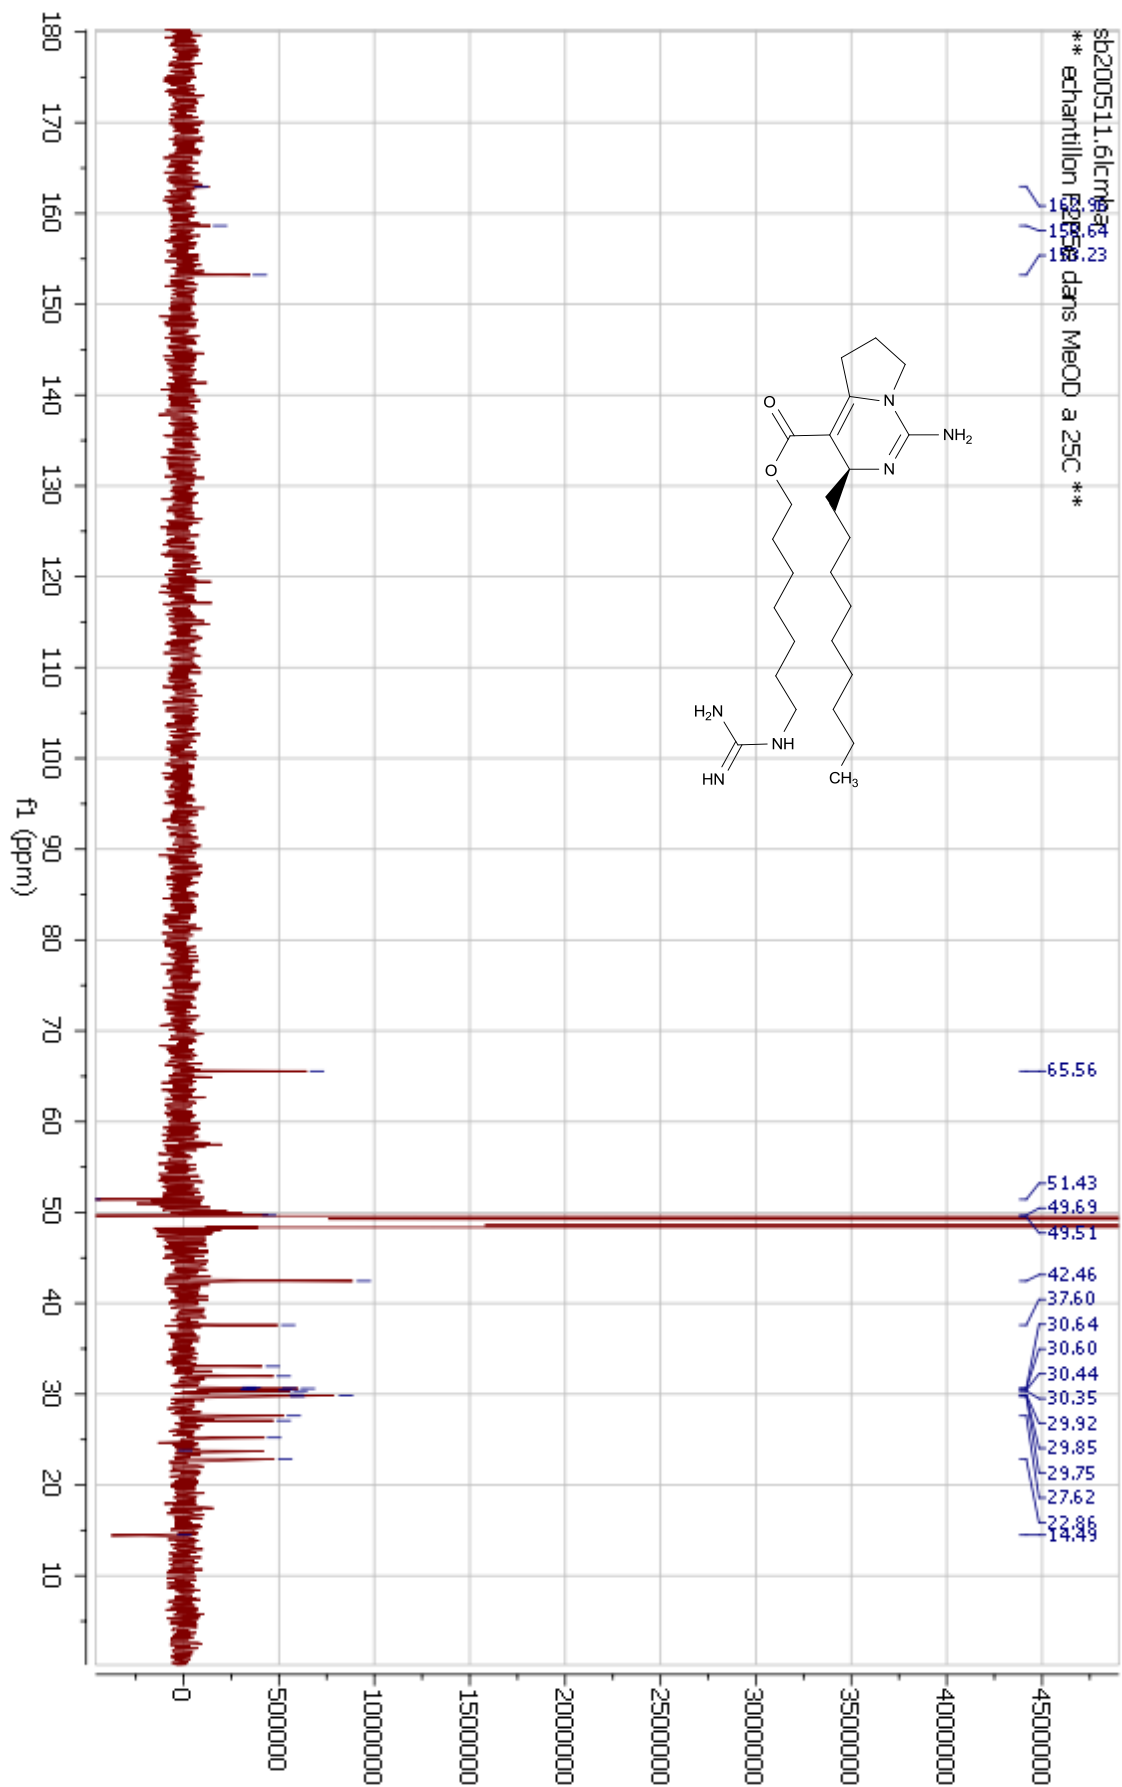

$^{13}\text{C}$  NMR spectrum (125 MHz,  $\text{CD}_3\text{OD}$ ) of crambescin A1 (4)

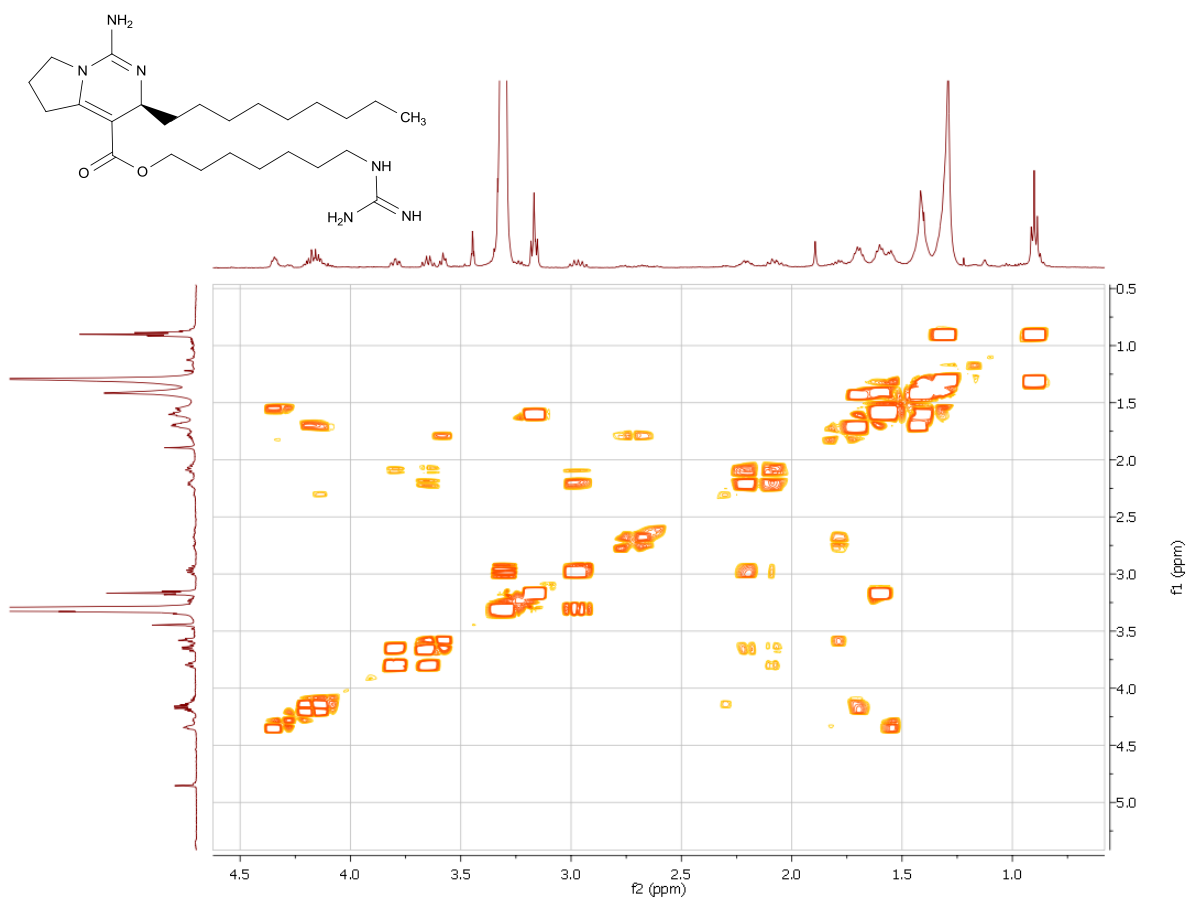

<sup>1</sup>H-<sup>1</sup>H COSY spectrum (500 MHz, CD<sub>3</sub>OD) of crambescin A1 (4)

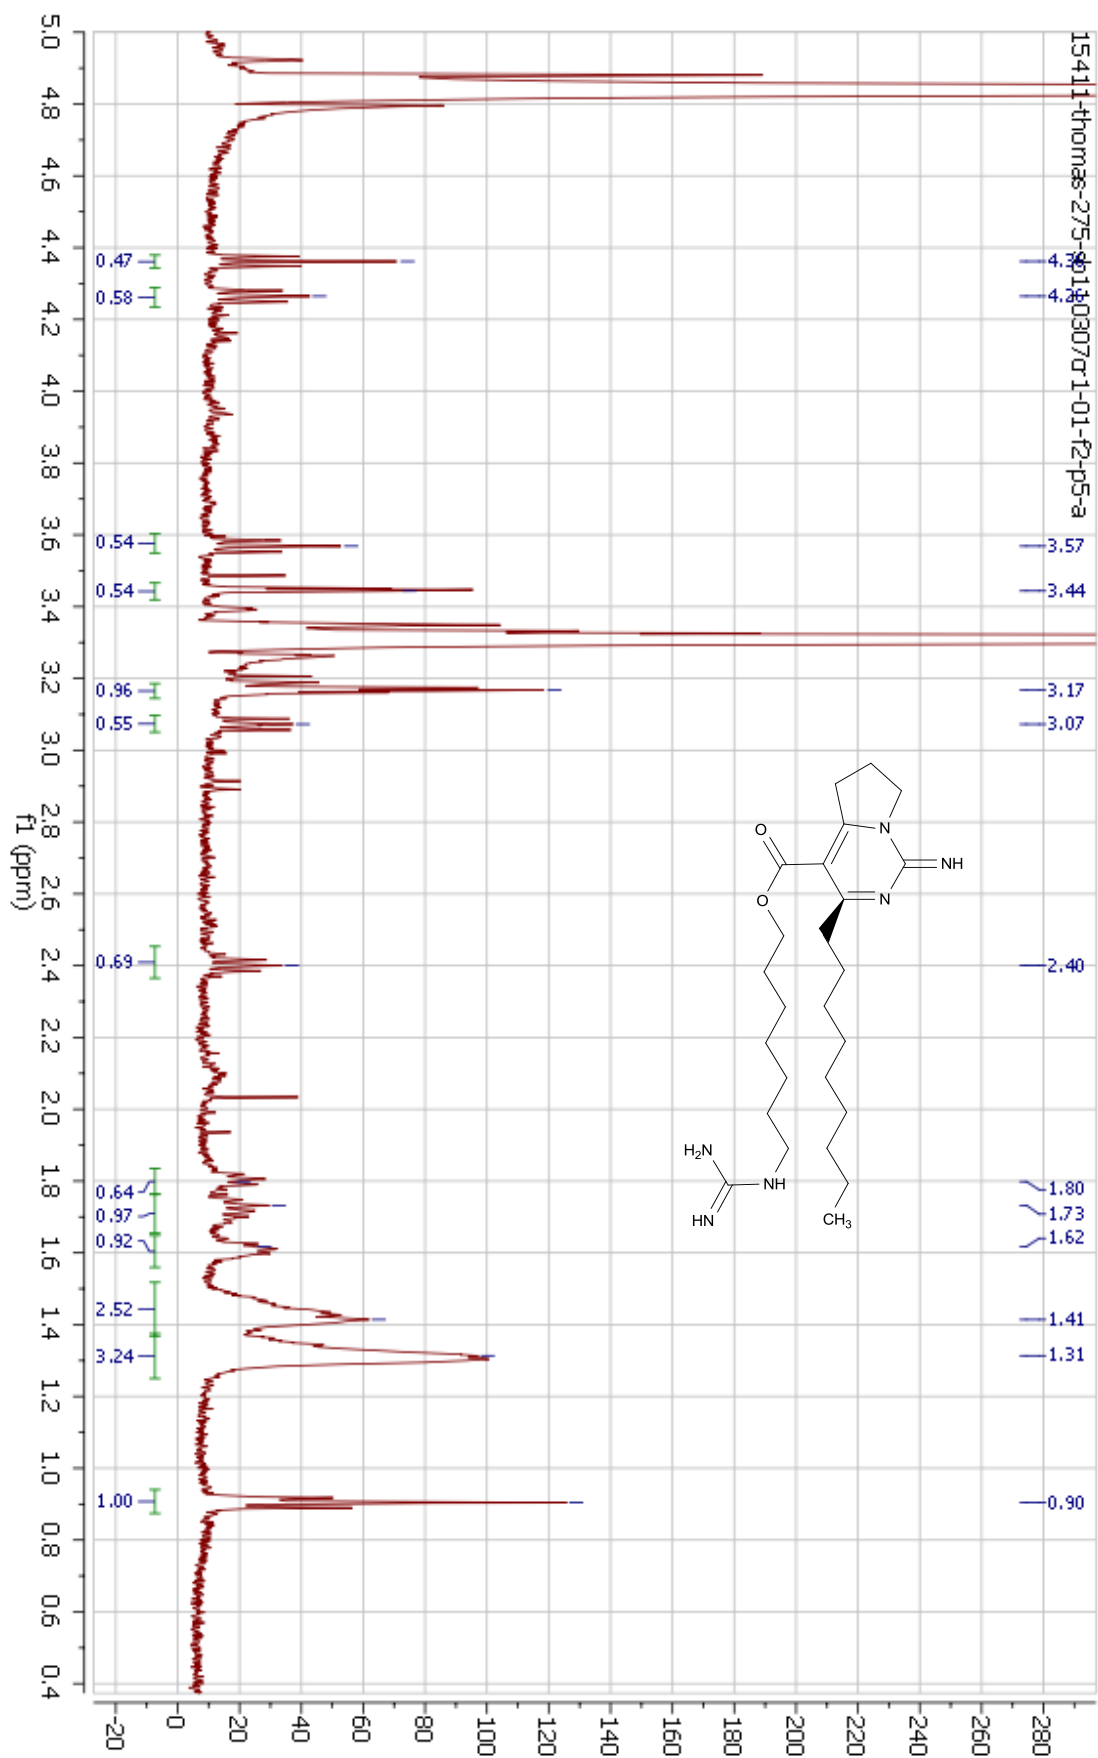

$^1\text{H}$  NMR spectrum (500 MHz,  $\text{CD}_3\text{OD}$ ) of didehydrocrambescin A1 (5)



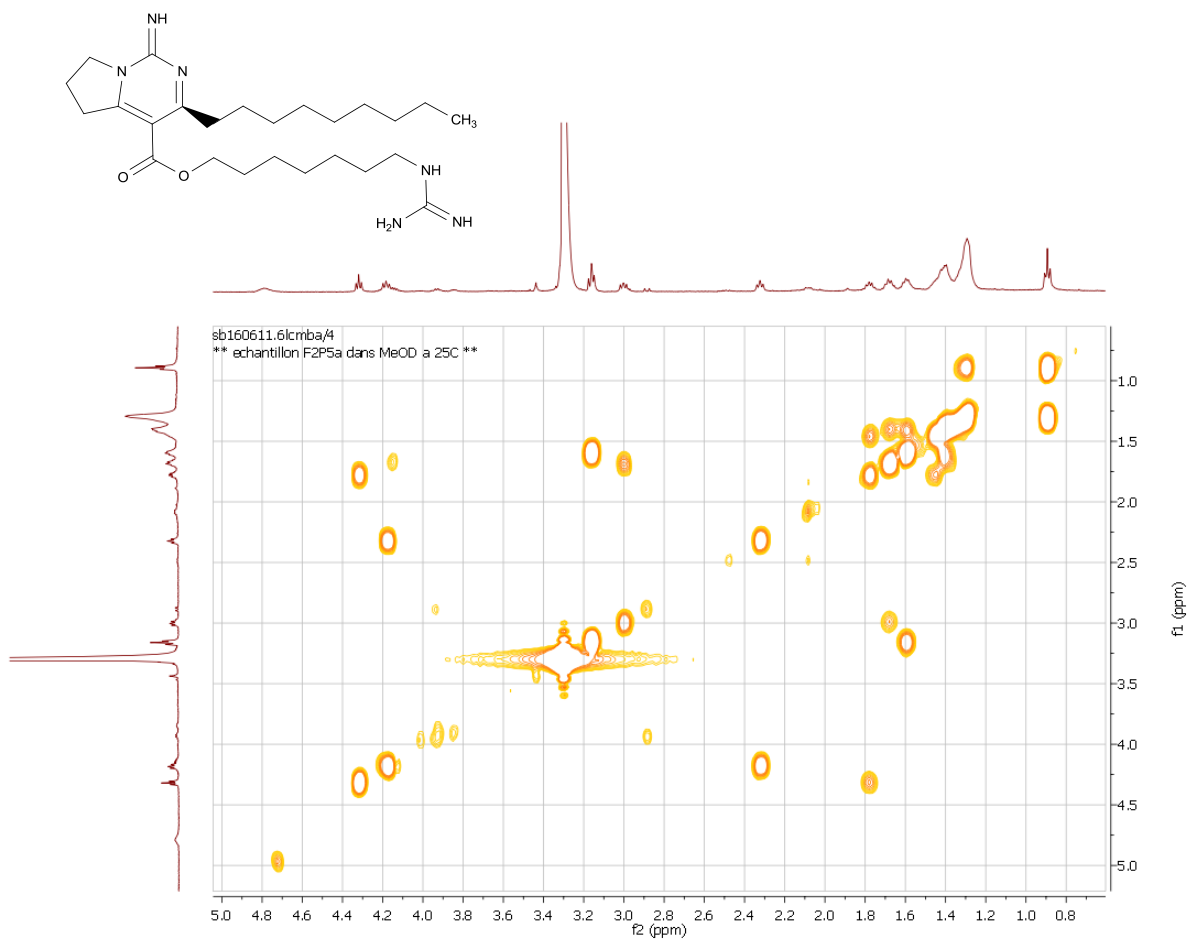

$^1\text{H}$ - $^1\text{H}$  COSY spectrum (500 MHz, CD<sub>3</sub>OD) of didehydrocrambescin A1 (5)

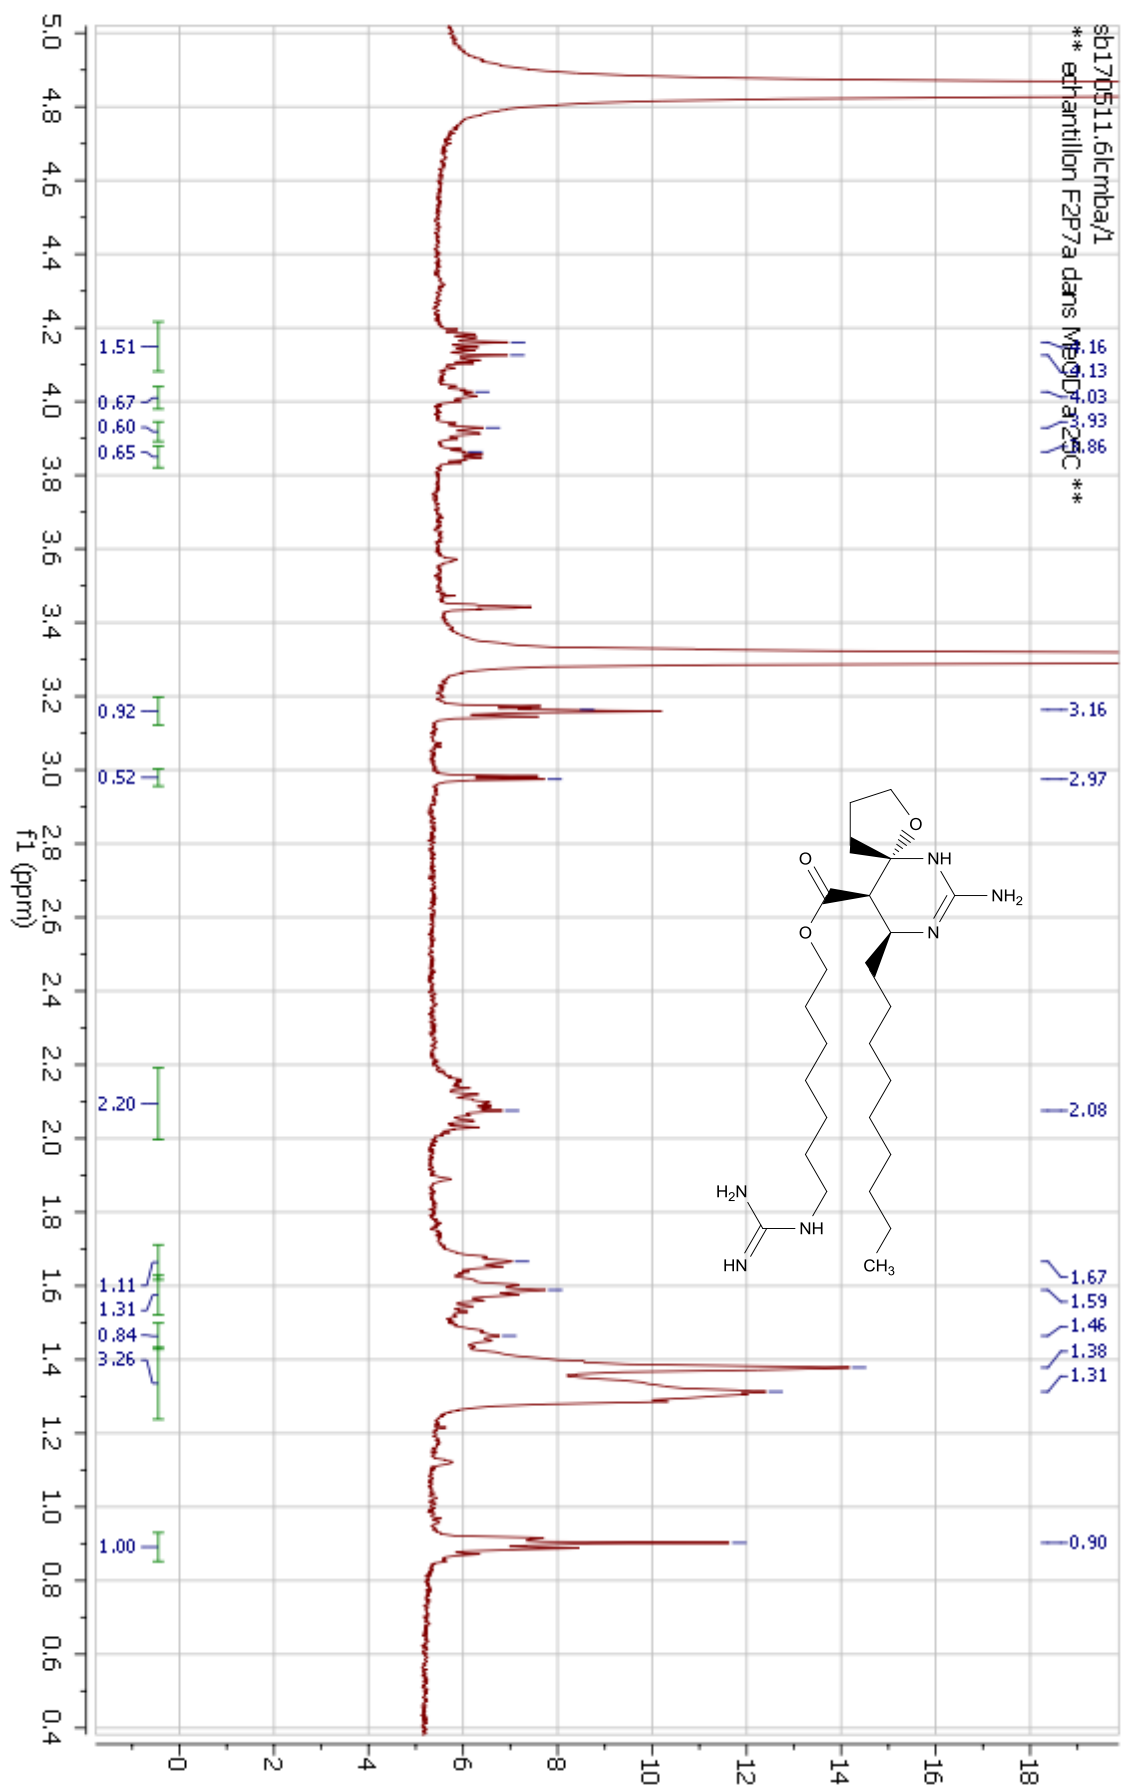

<sup>1</sup>H NMR spectrum (500 MHz, CD<sub>3</sub>OD) of crambescin B1 (7)

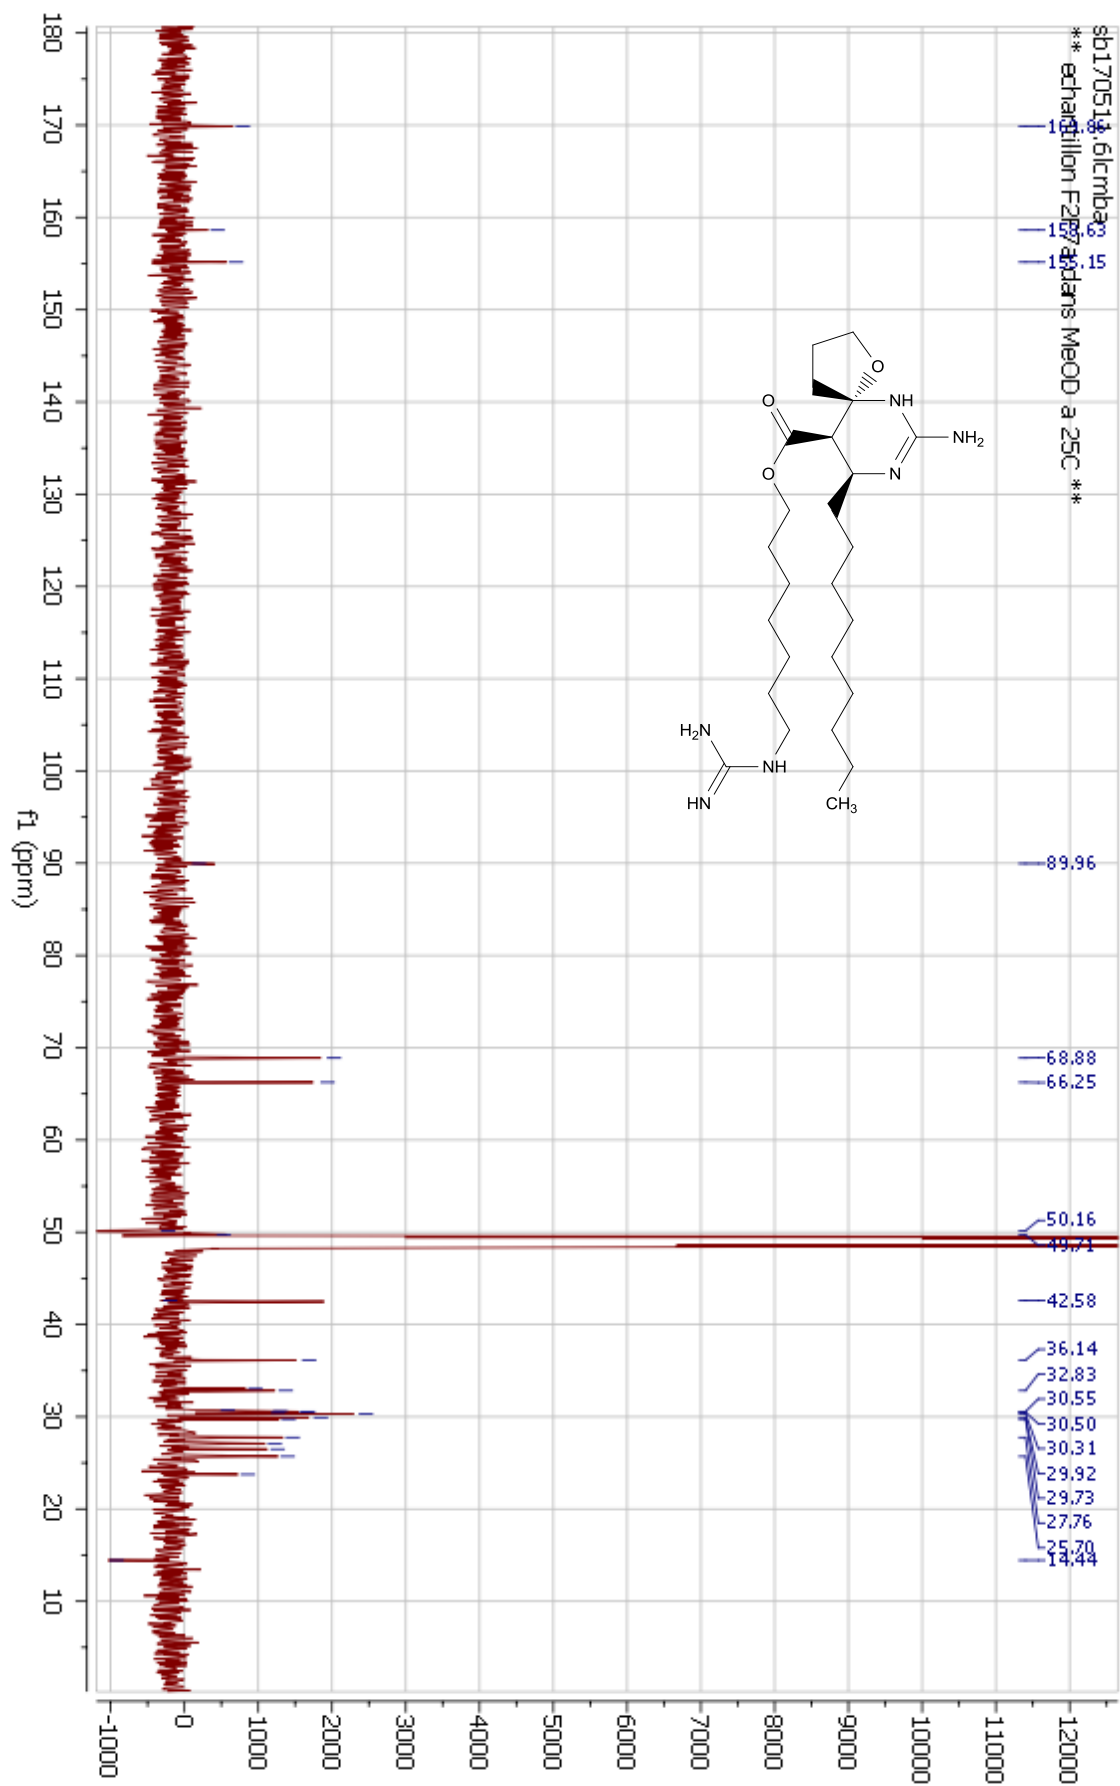

<sup>13</sup>C NMR spectrum (125 MHz, CD<sub>3</sub>OD) of crambescin B1 (7)

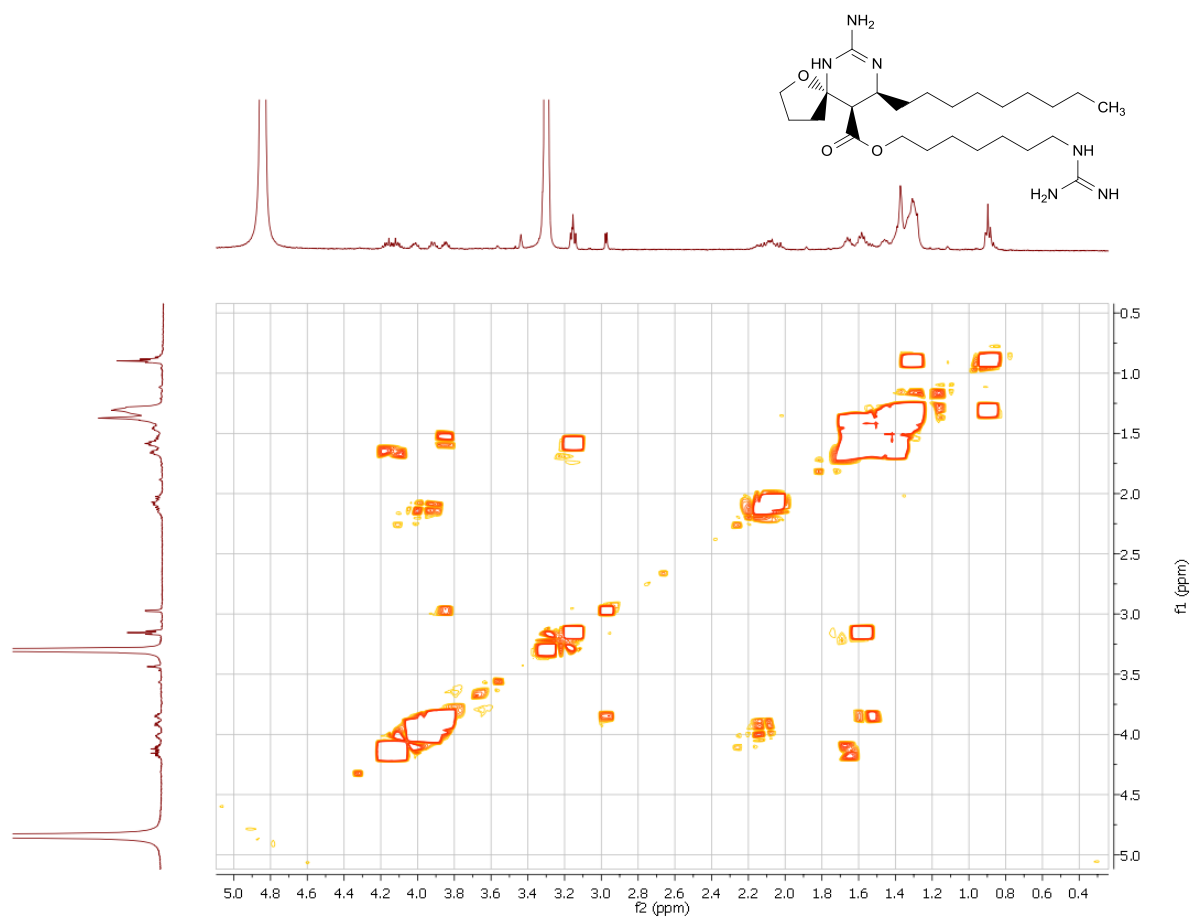

$^1\text{H}$ - $^1\text{H}$  COSY spectrum (500 MHz,  $\text{CD}_3\text{OD}$ ) of crambescin B1 (7)

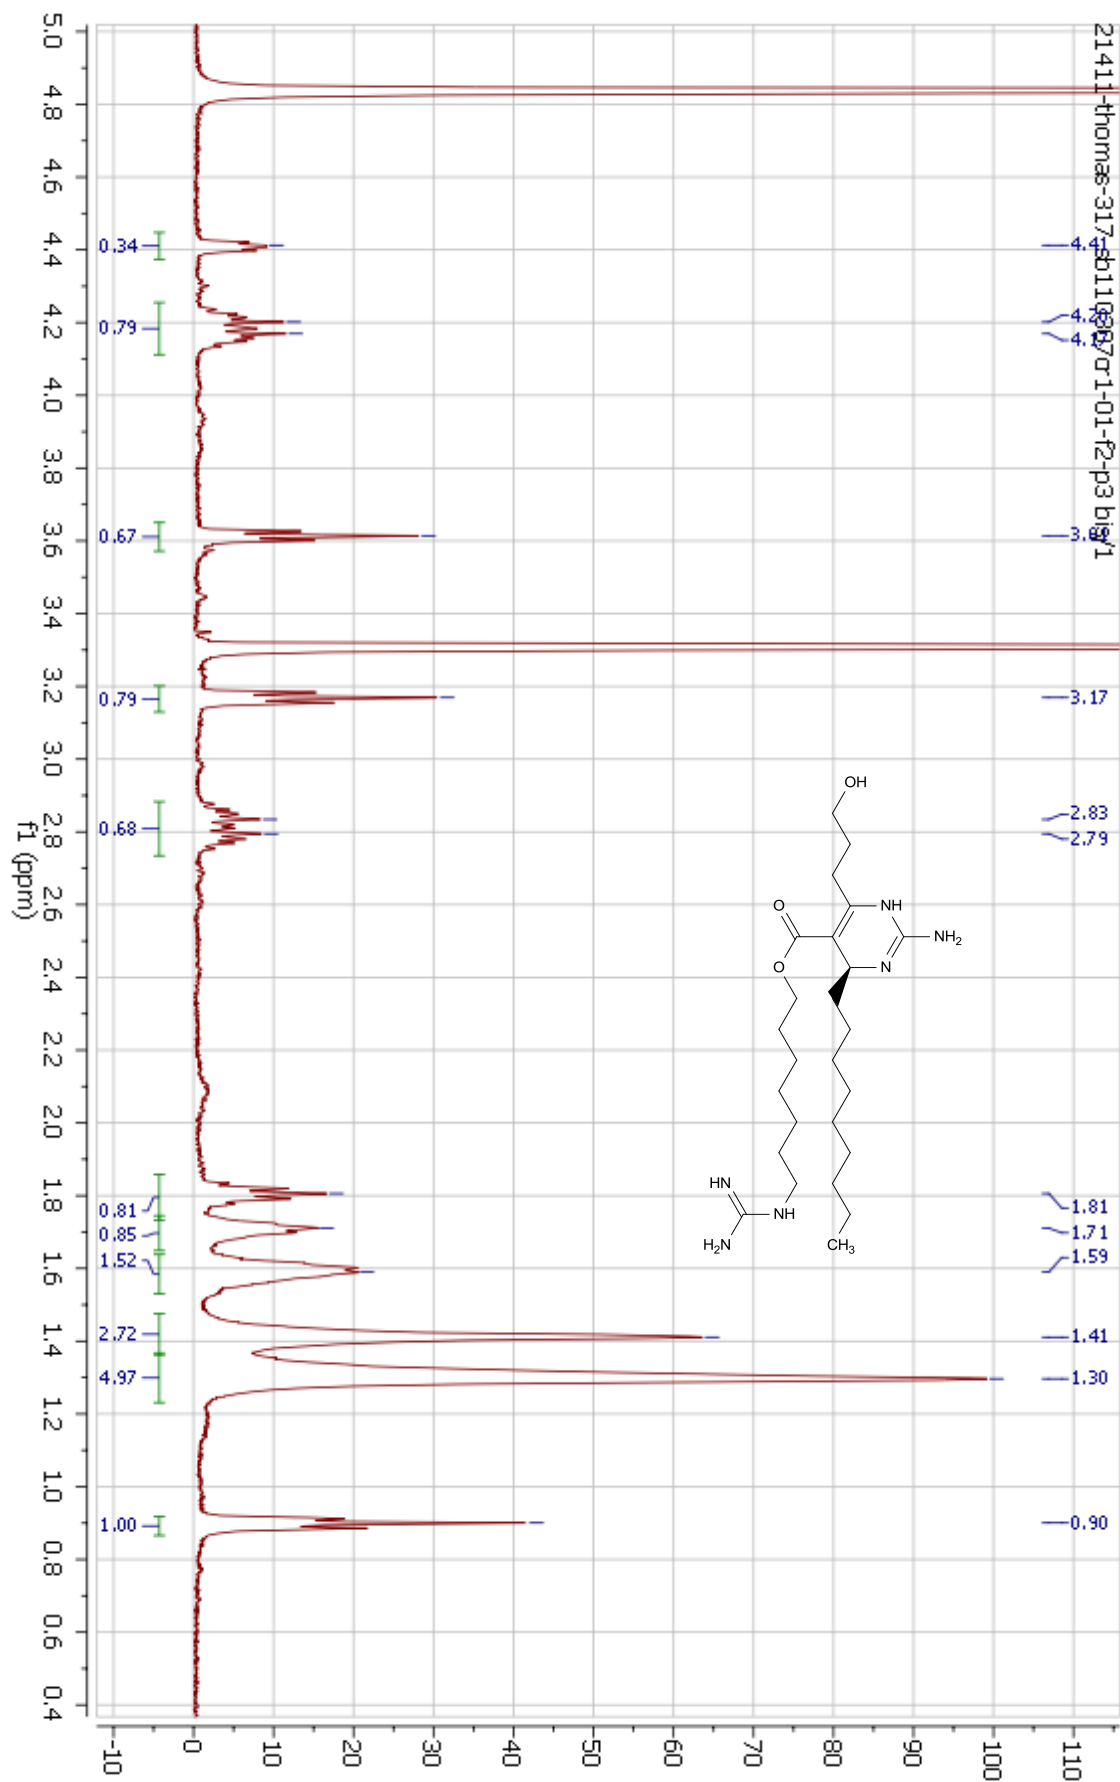

<sup>1</sup>H NMR spectrum (500 MHz, CD<sub>3</sub>OD) of crambescin C1 (10)

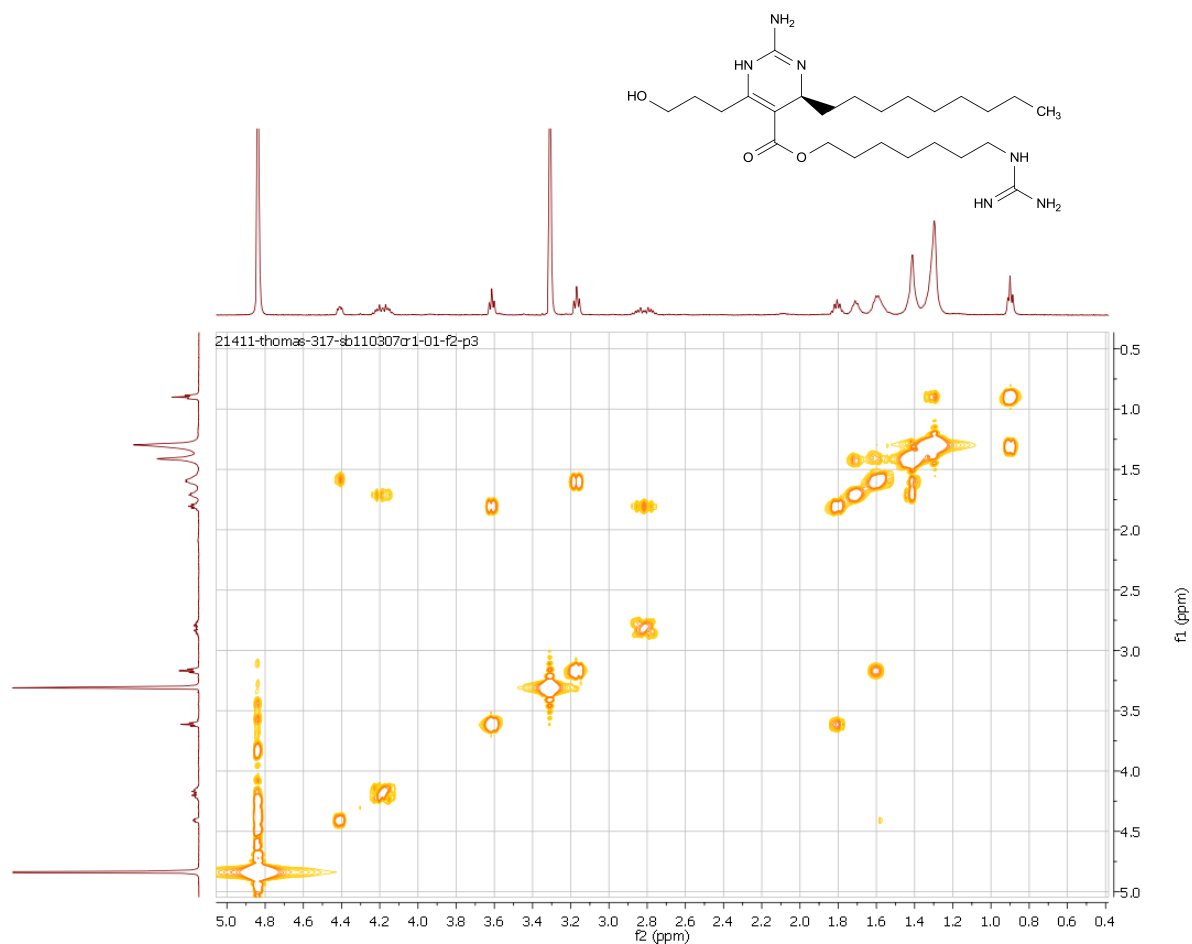

**<sup>1</sup>H-<sup>1</sup>H COSY spectrum (500 MHz, CD<sub>3</sub>OD) of crambescin C1 (10)**



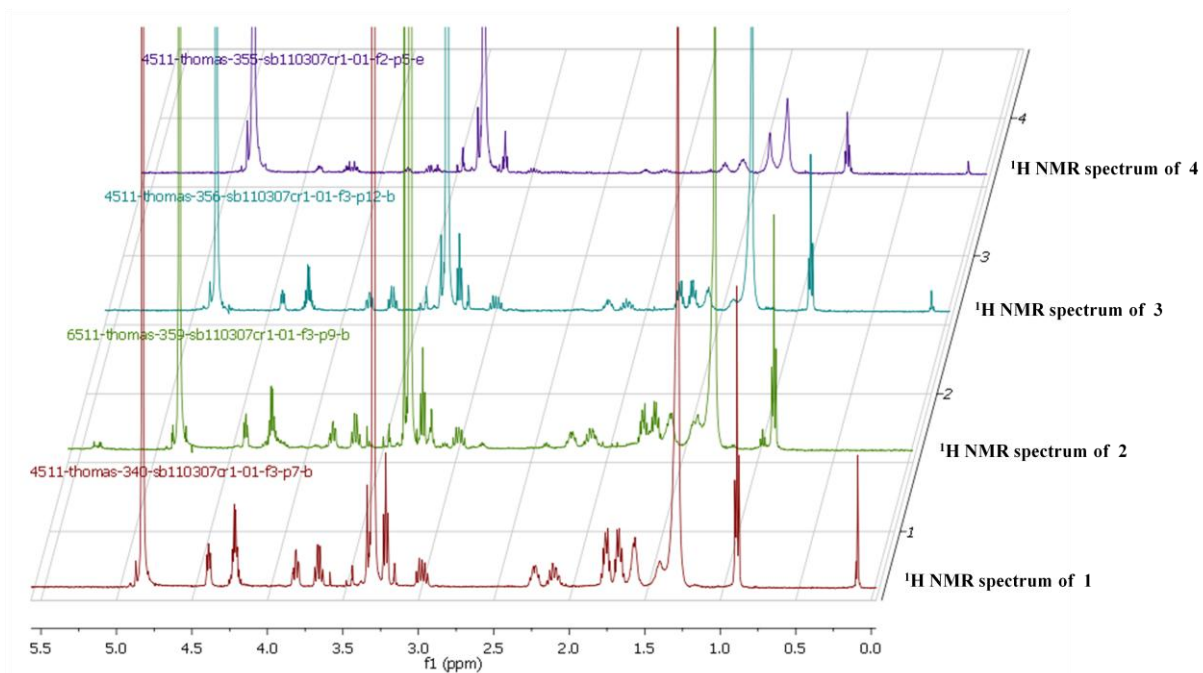

<sup>1</sup>H NMR spectra of crambescins A2 (1-3) and crambescin A1 (4)

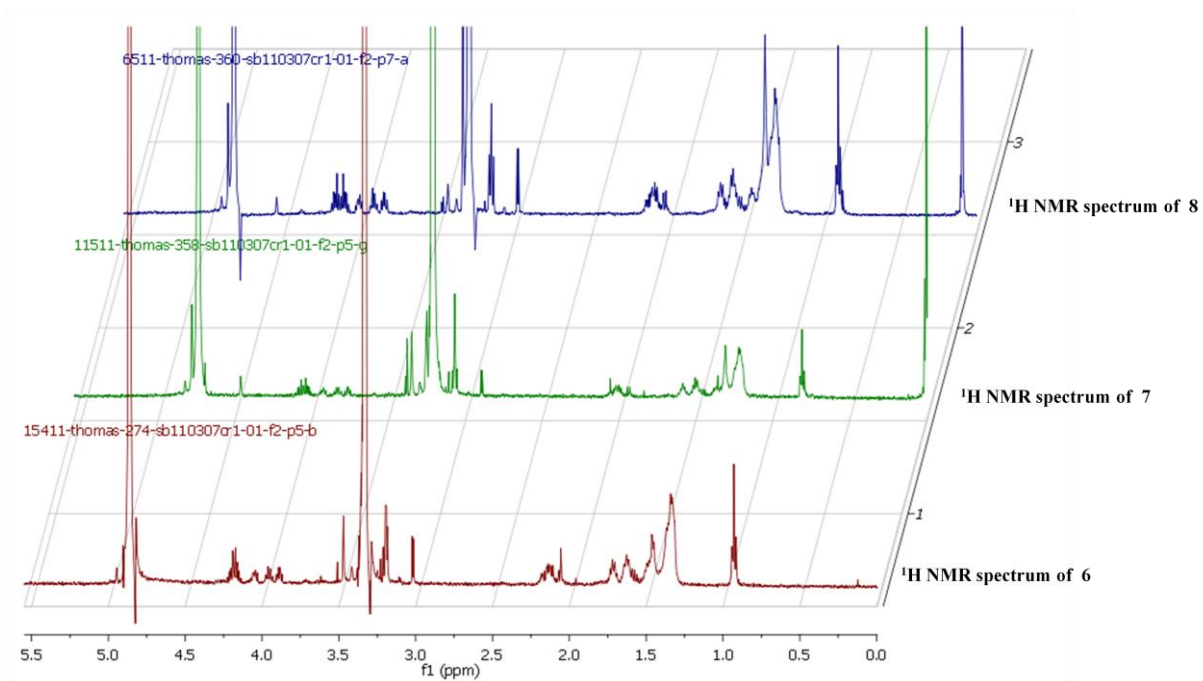

<sup>1</sup>H NMR spectra of crambescins B1 (6-8)



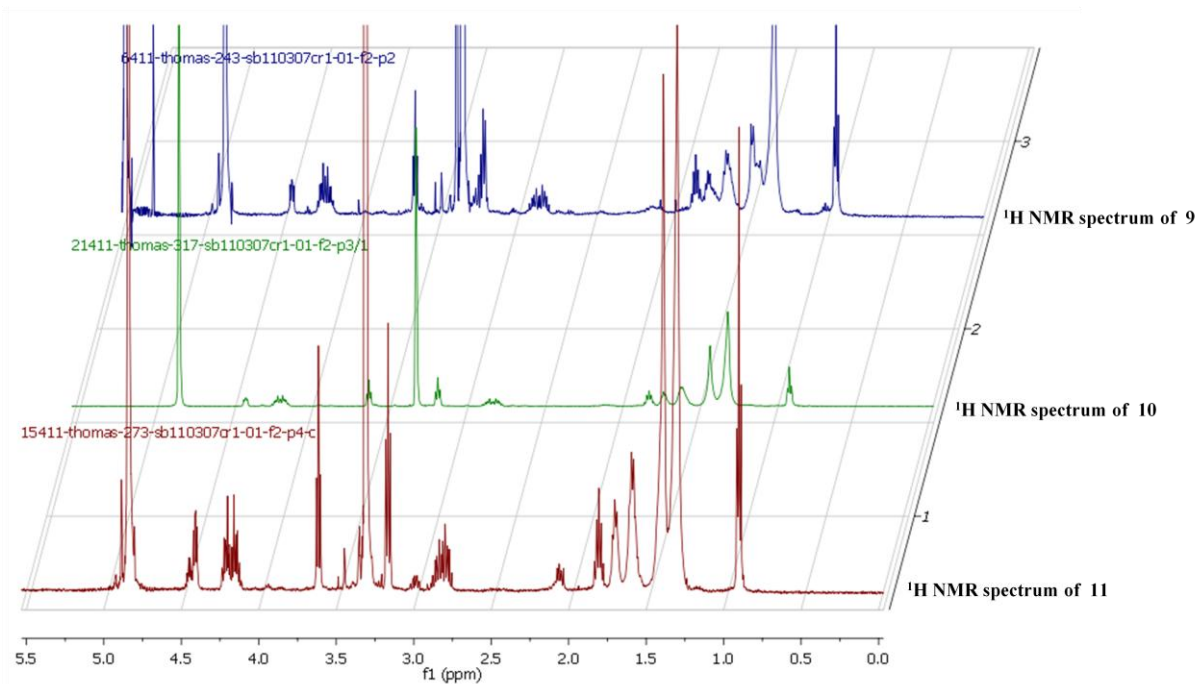

<sup>1</sup>H NMR spectra of crambescins C1 (9-11)

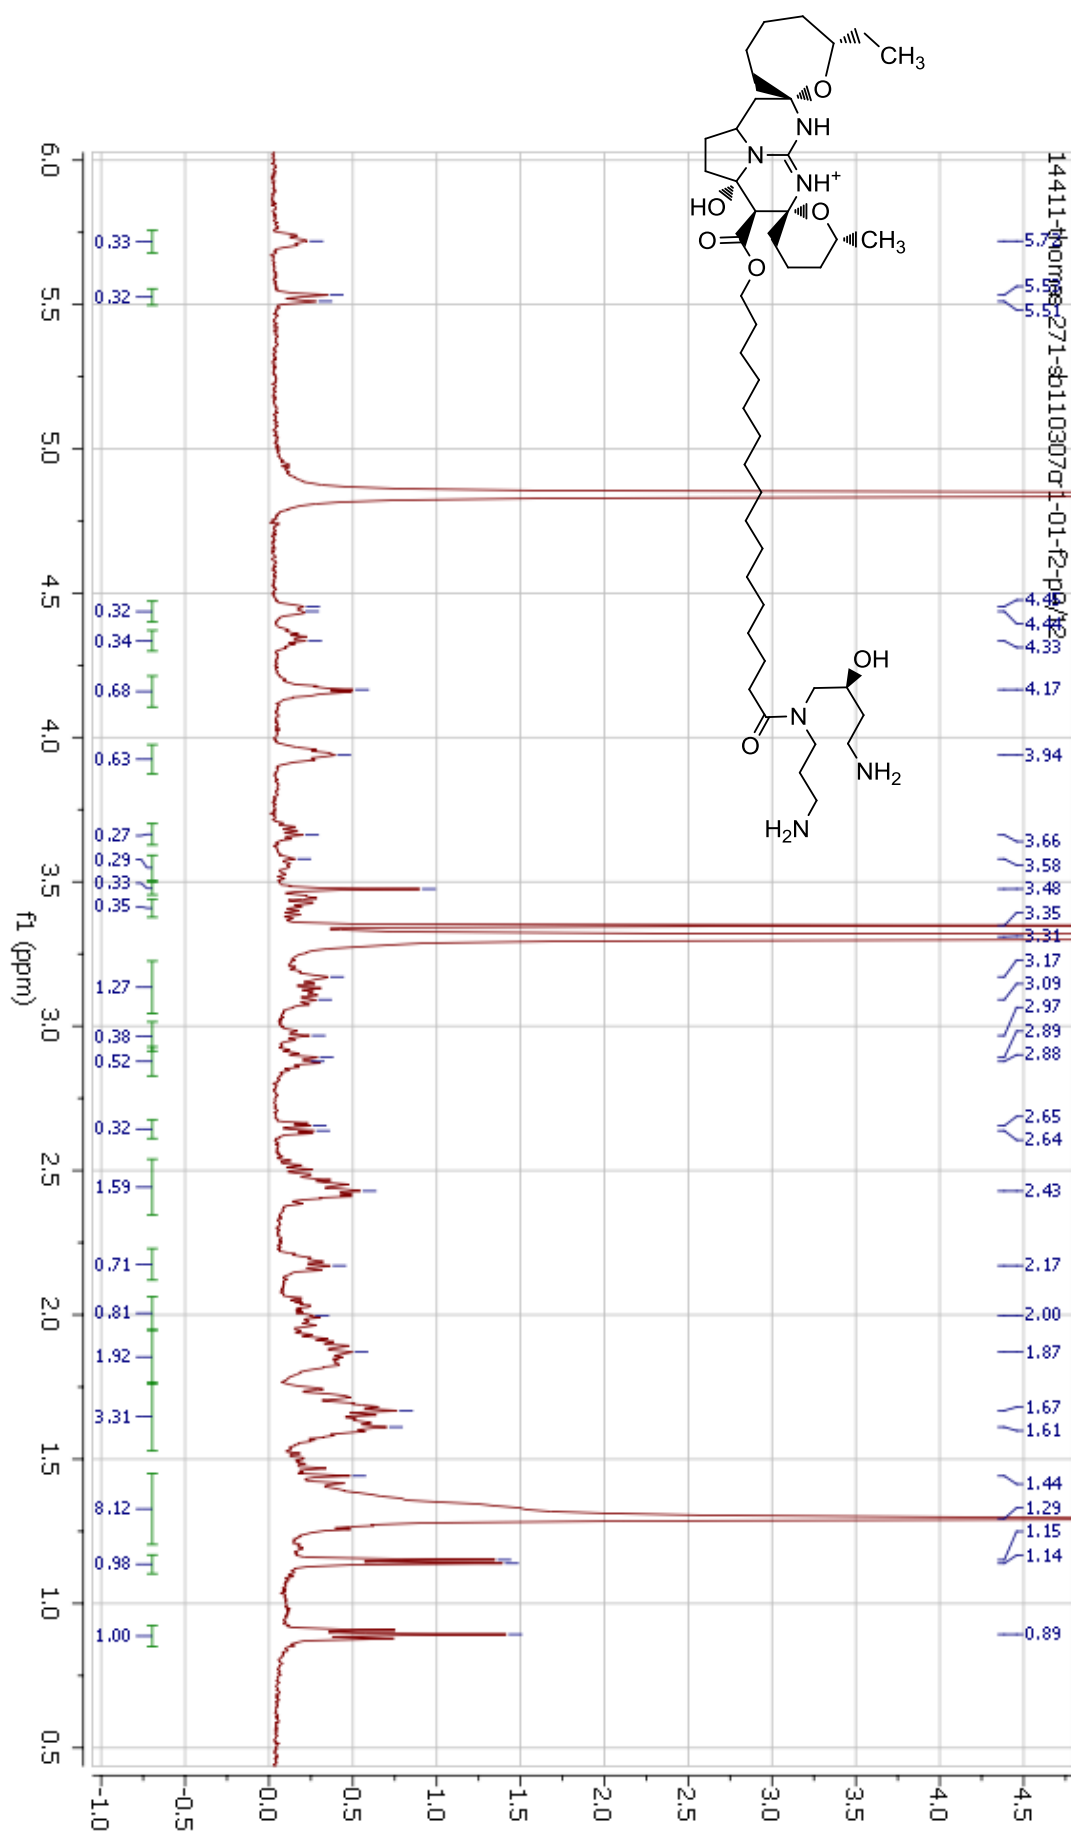

<sup>1</sup>H NMR spectrum of crambescidin 816 (12)

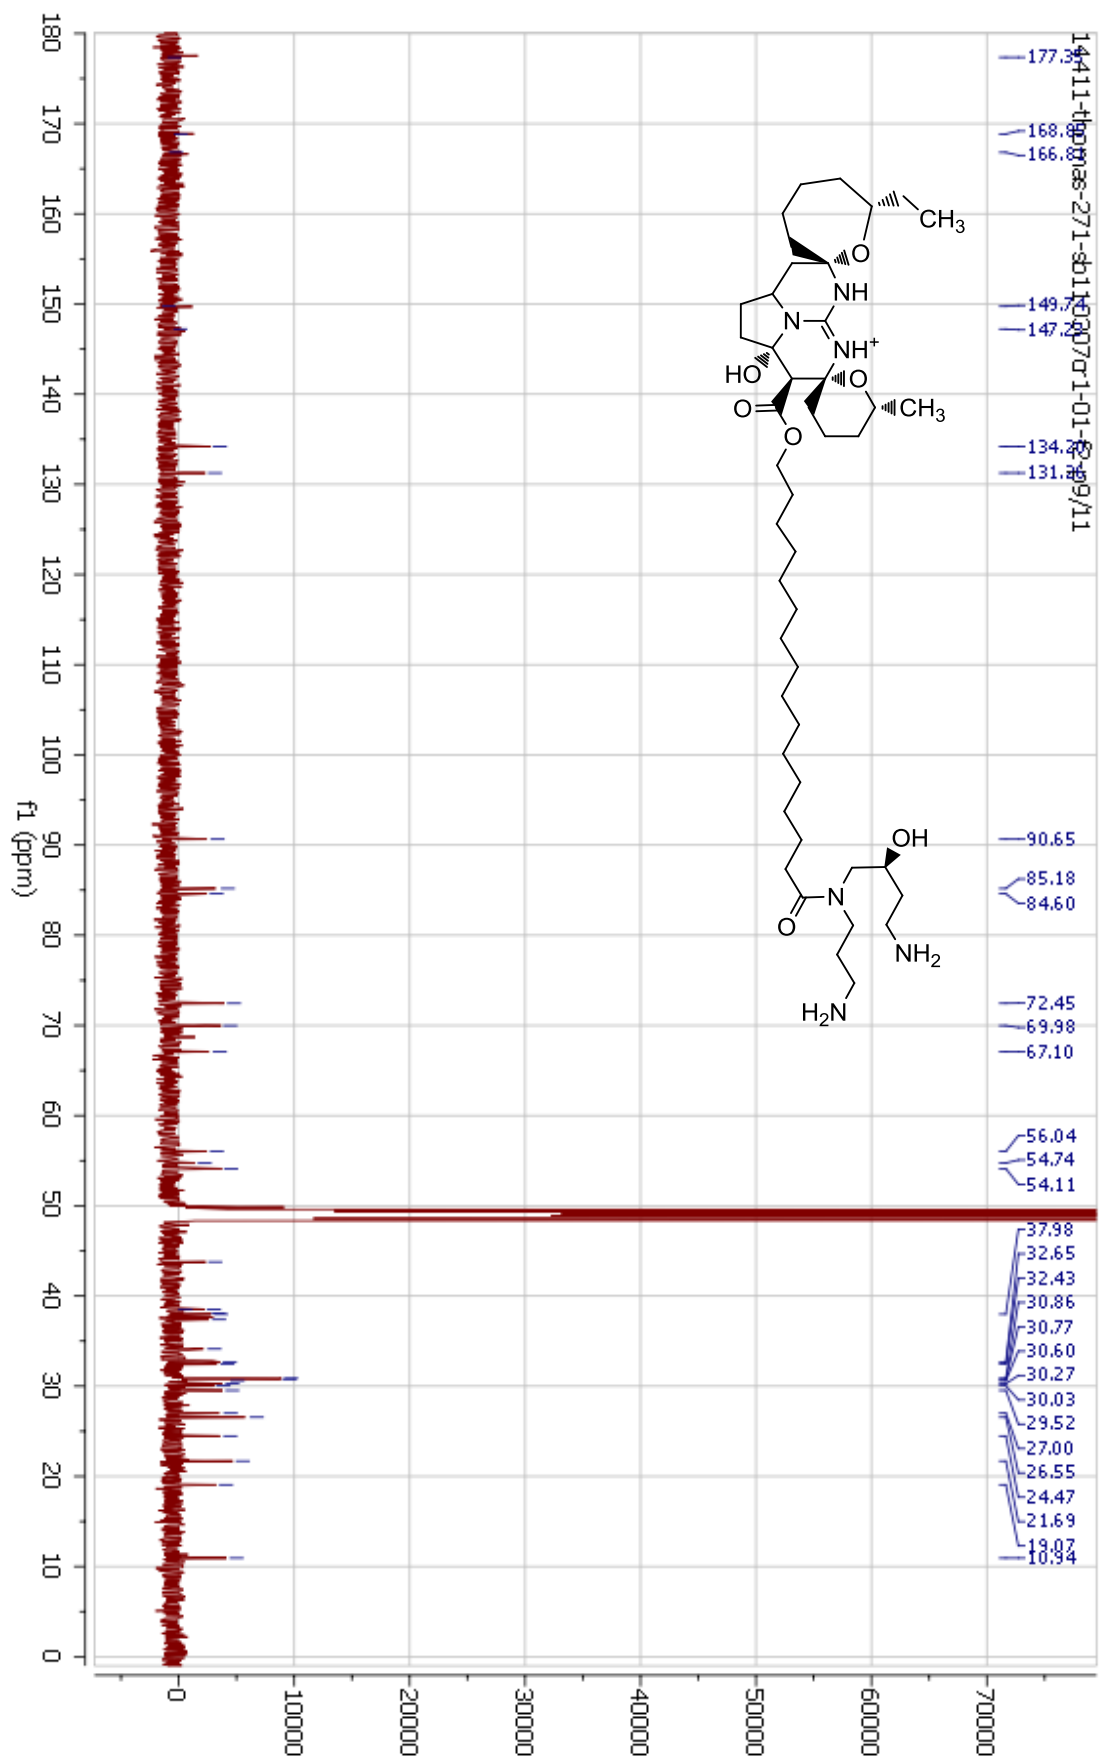

<sup>13</sup>C NMR spectrum of crambescidin 816 (12)

OTH\_110803123213 #5 RT: 0.05 AV: 1 NL: 2.35E7  
T: FTMS + p ESI Full ms2 449.30@cid30.00 [120.00-454.00]

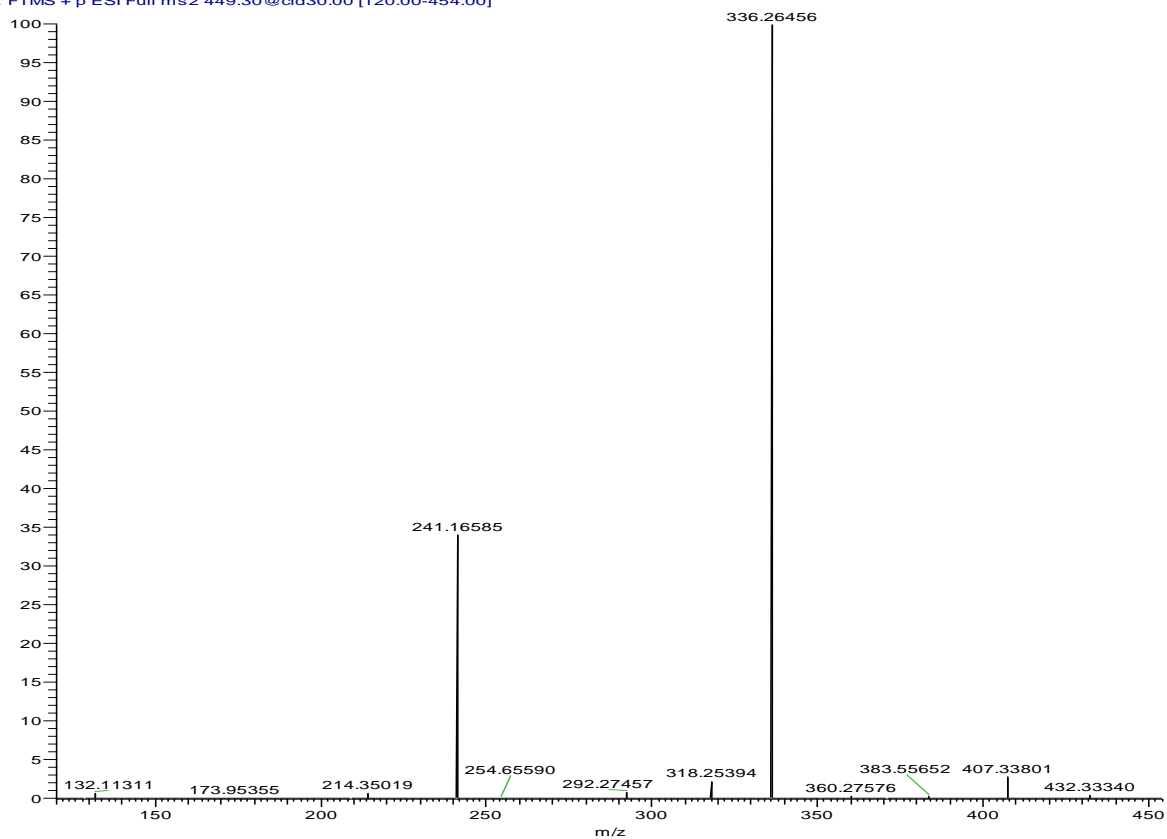

#### HRMS/MS spectrum of crambescin A2 (1)

OTH\_110708181022 #2 RT: 0.05 AV: 1 NL: 8.71E6  
T: FTMS + p ESI Full ms2 463.37@cid35.00 [125.00-468.45]

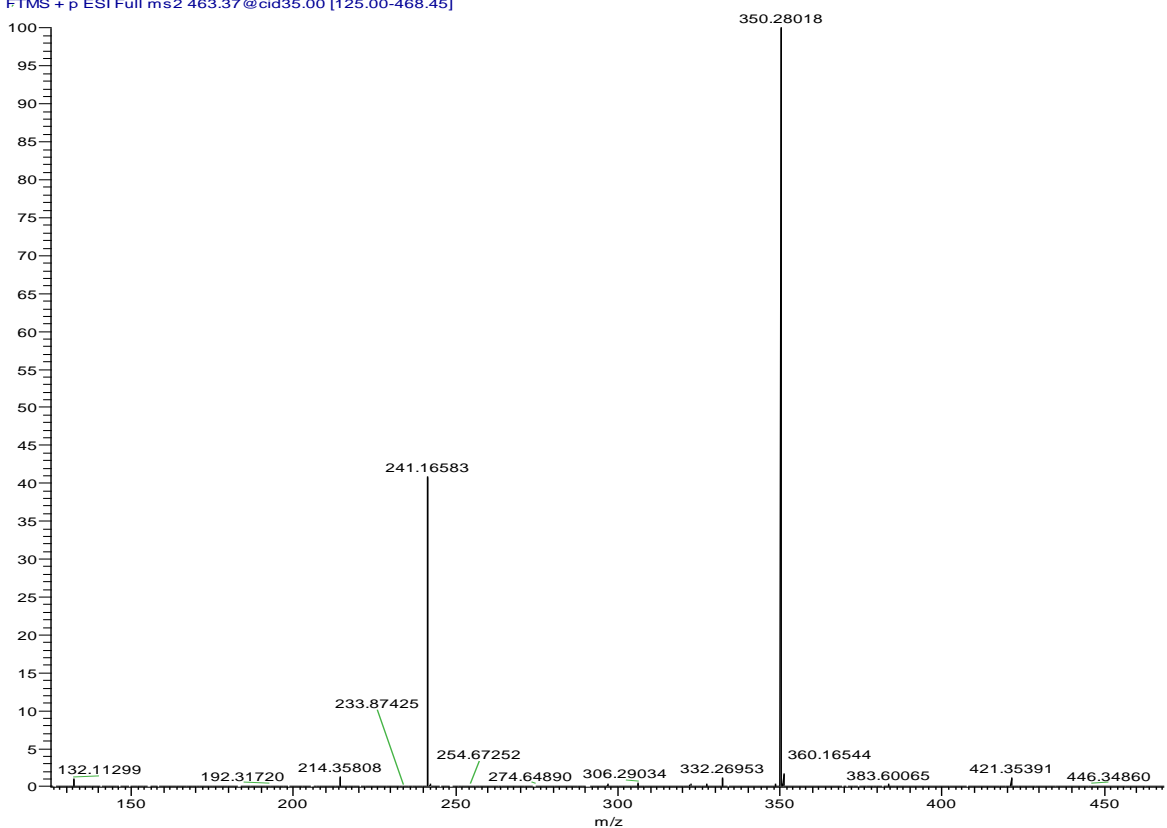

#### HRMS/MS spectrum of crambescin A2 (2)

OTH\_110708161737 #2 RT: 0.04 AV: 1 NL: 1.76E6  
T: FTMS + p ESI Full ms2 477.30@cid35.00 [130.00-482.30]

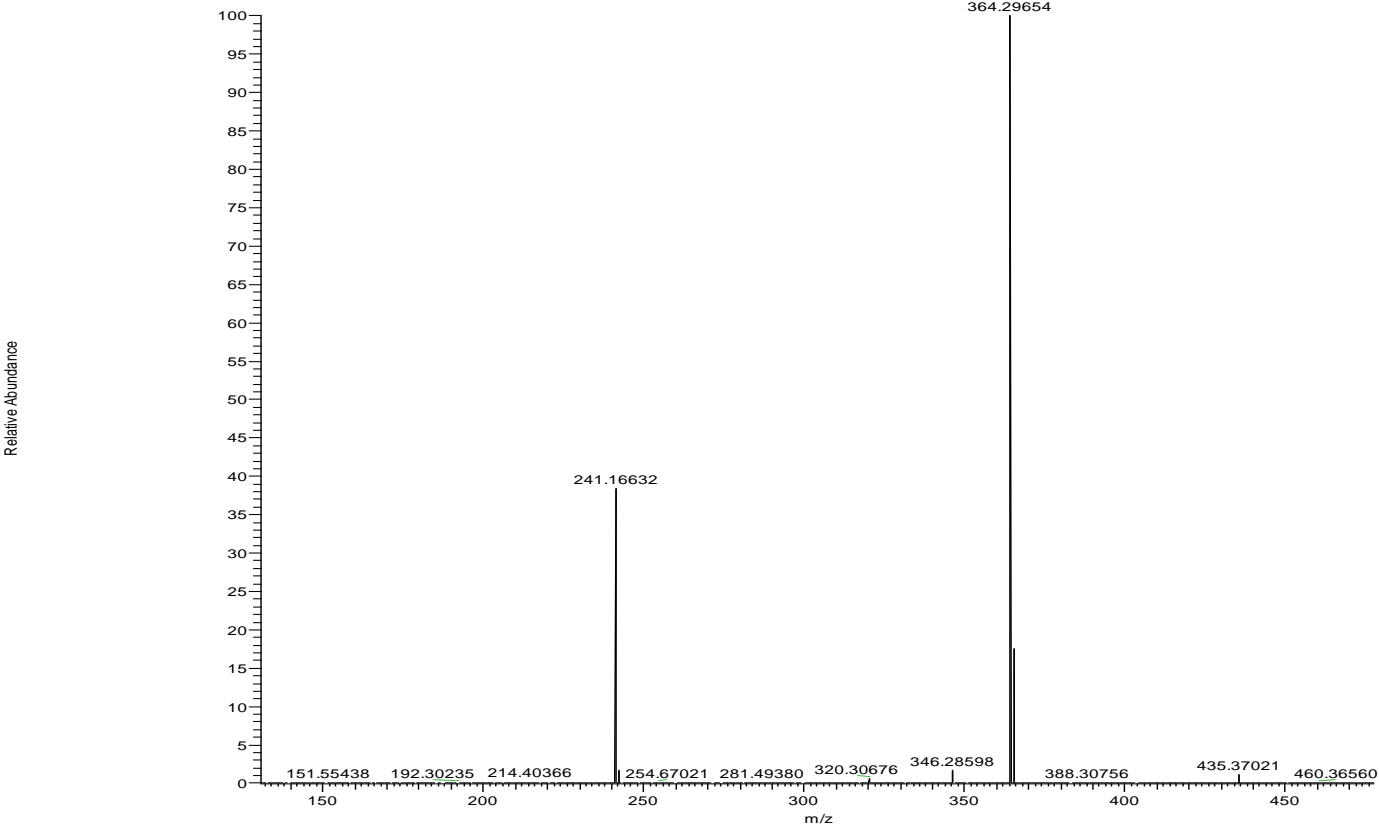

### HRMS/MS spectrum of crambescin A2 (3)

OTH\_110803125128 #5 RT: 0.05 AV: 1 NL: 2.94E6  
T: FTMS + p ESI Full ms2 463.30@cid30.00 [125.00-468.30]

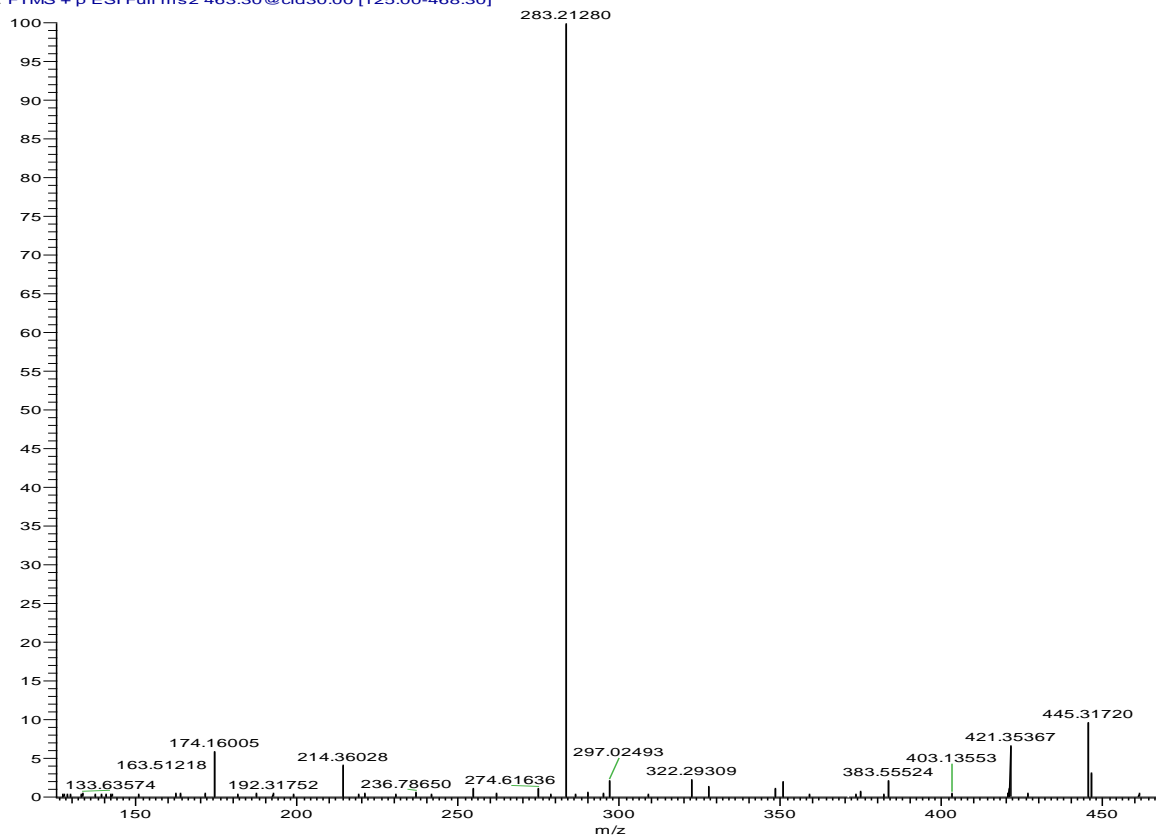

### HRMS/MS spectrum of crambescin A1 (4)

OTH\_110913164654 #8 RT: 0.07 AV: 1 NL: 1.27E5  
T: FTMS + p ESI Full ms2 231.20@cid30.00 [60.00-470.00]

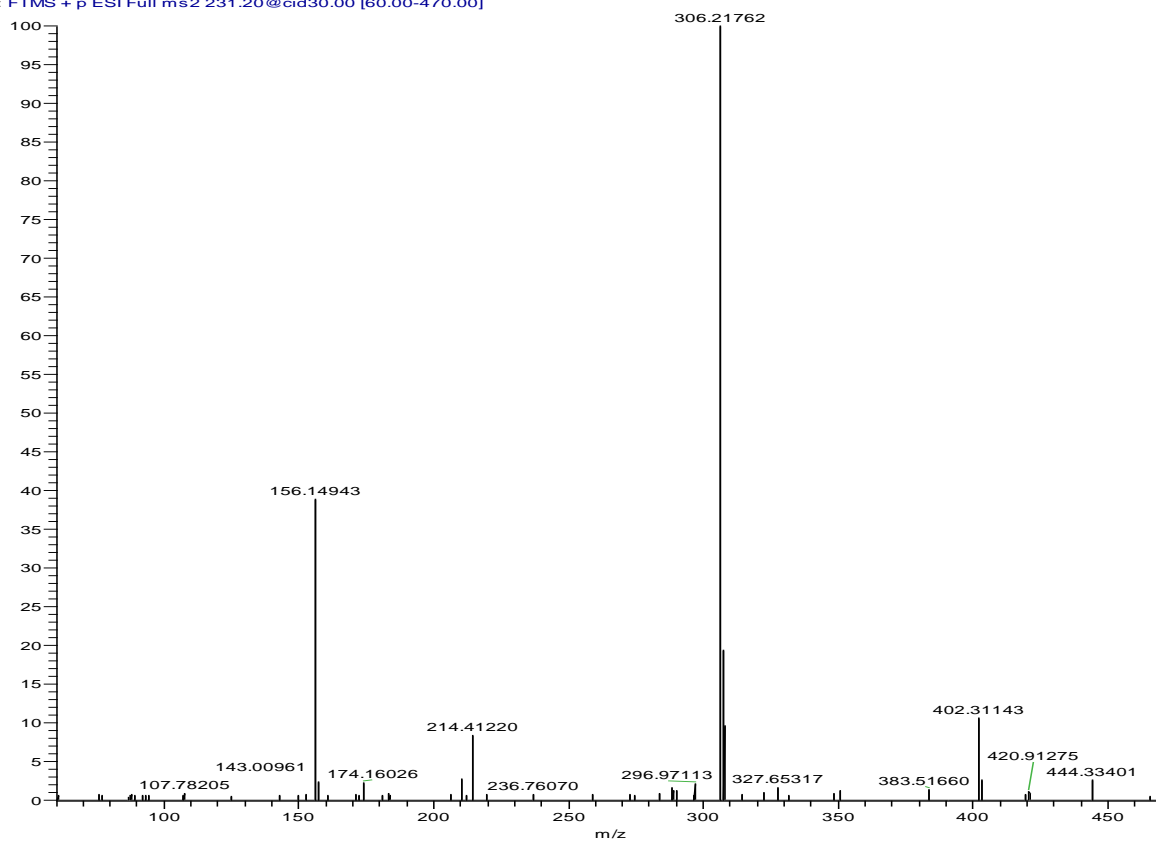

HRMS/MS spectrum of didehydrocrambescin A1 (5)

OTH\_110708171926 #4 RT: 0.04 AV: 1 NL: 5.80E6  
T: FTMS + p ESI Full ms2 467.35@cid35.00 [125.00-472.45]

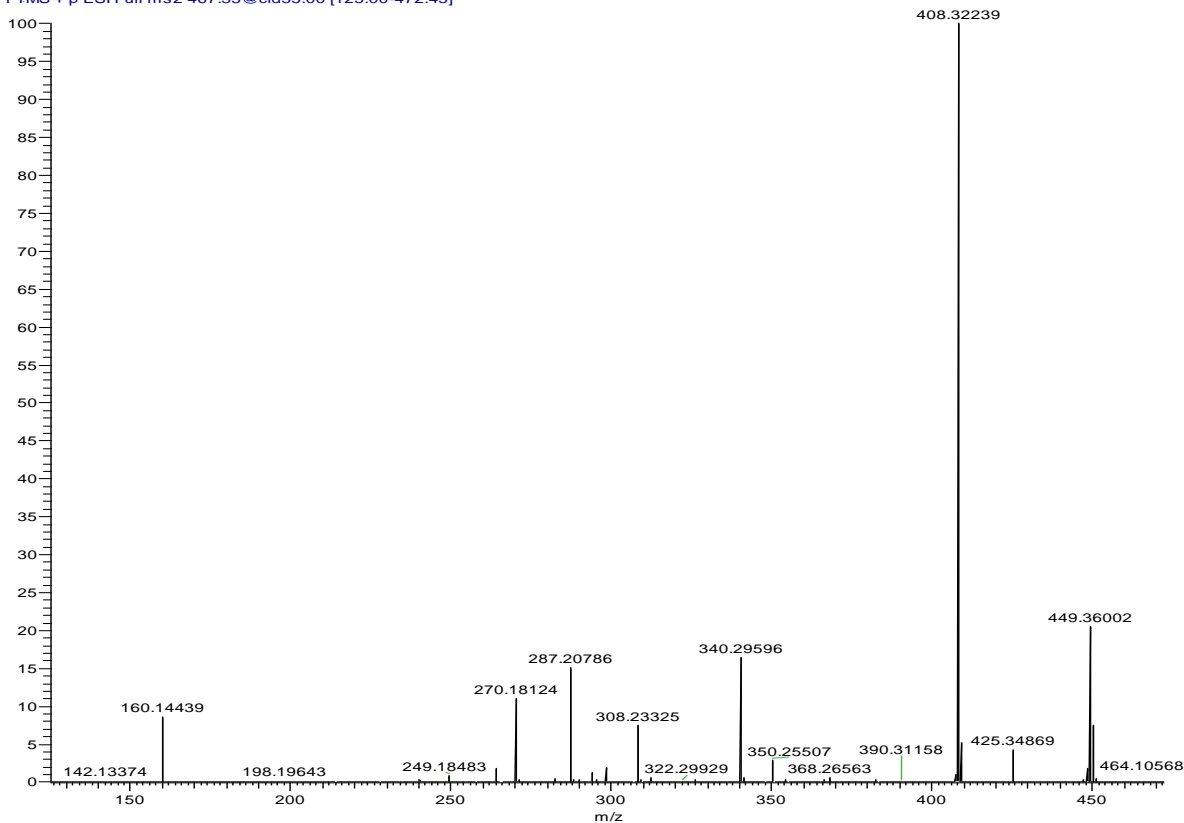

HRMS/MS spectrum of crambescin B1 (6)

OTH\_110708170525 #4 RT: 0.04 AV: 1 NL: 1.22E7  
T: FTMS + p ESI Full ms2 481.30@cid35.00 [130.00-486.40]

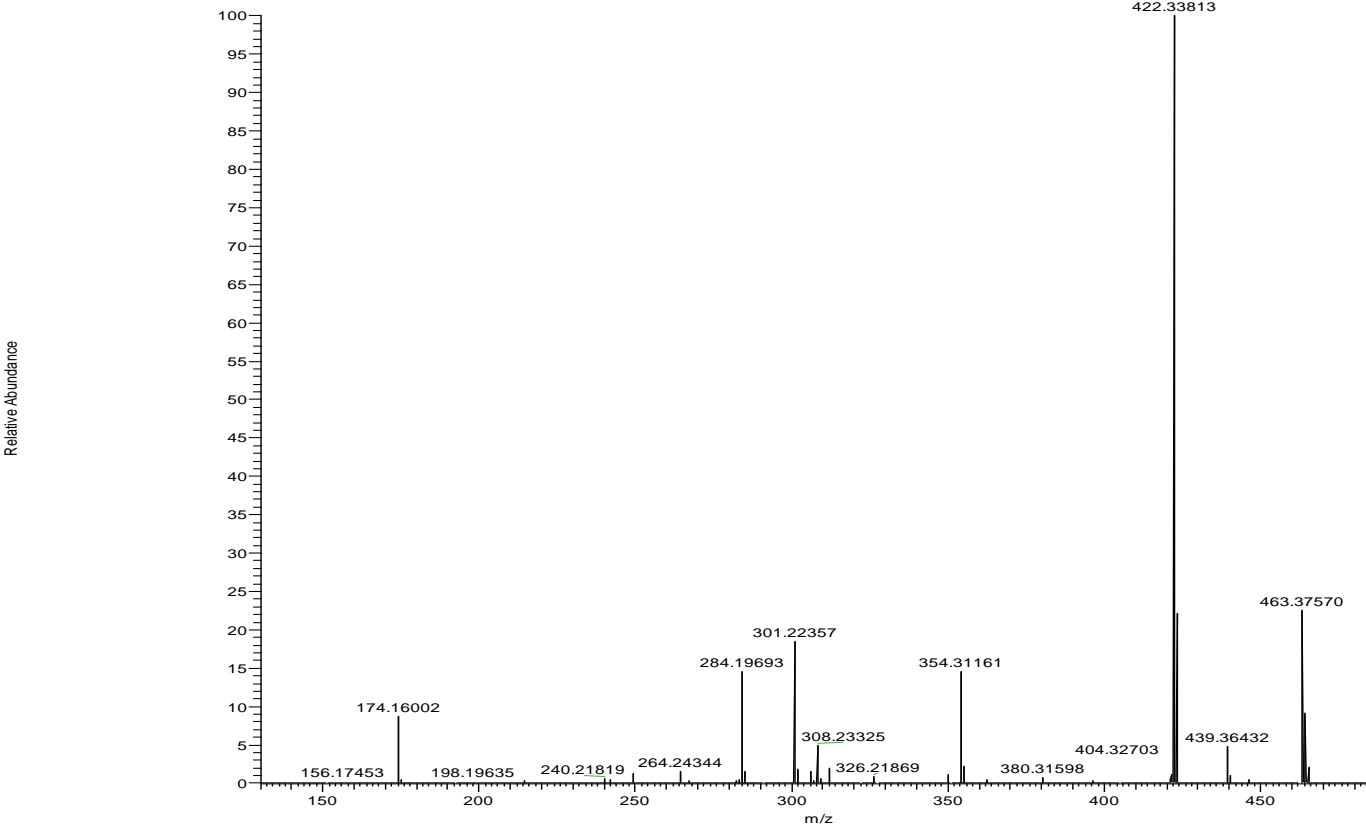

HRMS/MS spectrum of crambescin B1 (7)

080711OTH01 #132 RT: 2.03 AV: 1 NL: 1.26E6  
F: FTMS + p ESI d Full ms2 495.40@cid35.00 [125.00-510.00]

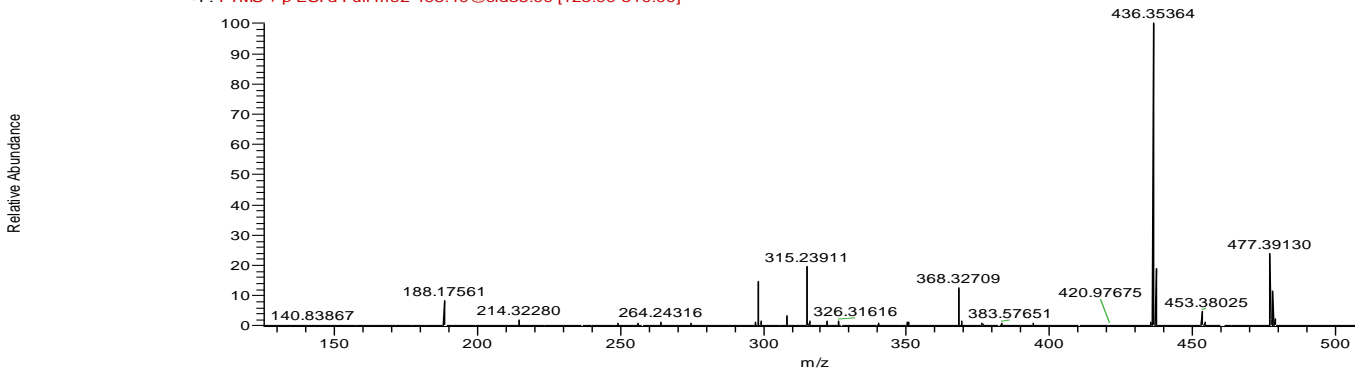

HRMS/MS spectrum of crambescin B1 (8)

OTH\_110708175541 #2 RT: 0.03 AV: 1 NL: 4.24E6  
T: FTMS + p ESI Full ms2 467.37@cid35.00 [125.00-472.36]

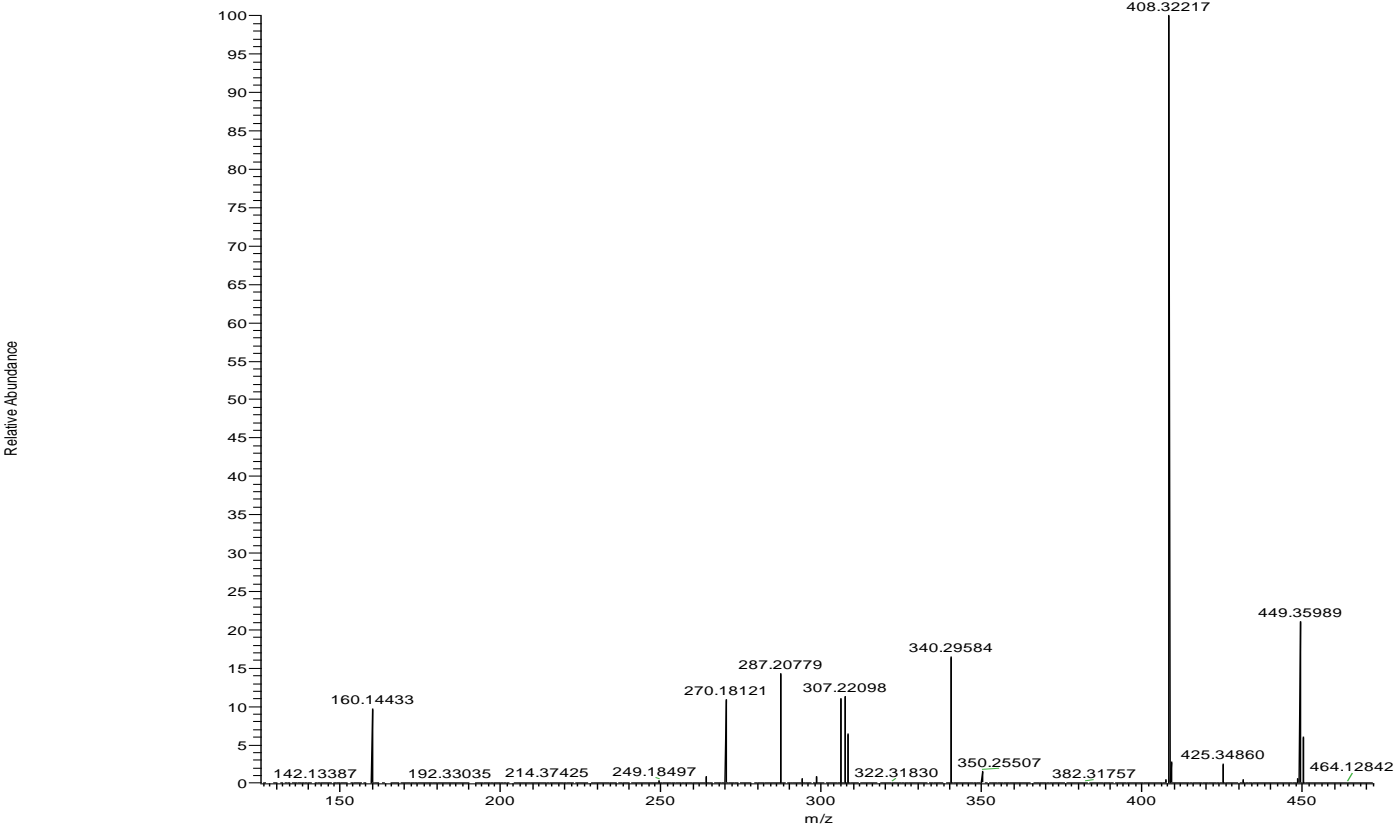

HRMS/MS spectrum of crambescin C1 (9)

OTH\_110704183839 #4 RT: 0.04 AV: 1 NL: 1.80E7  
T: FTMS + p ESI Full ms2 481.38@cid25.00 [130.00-500.00]

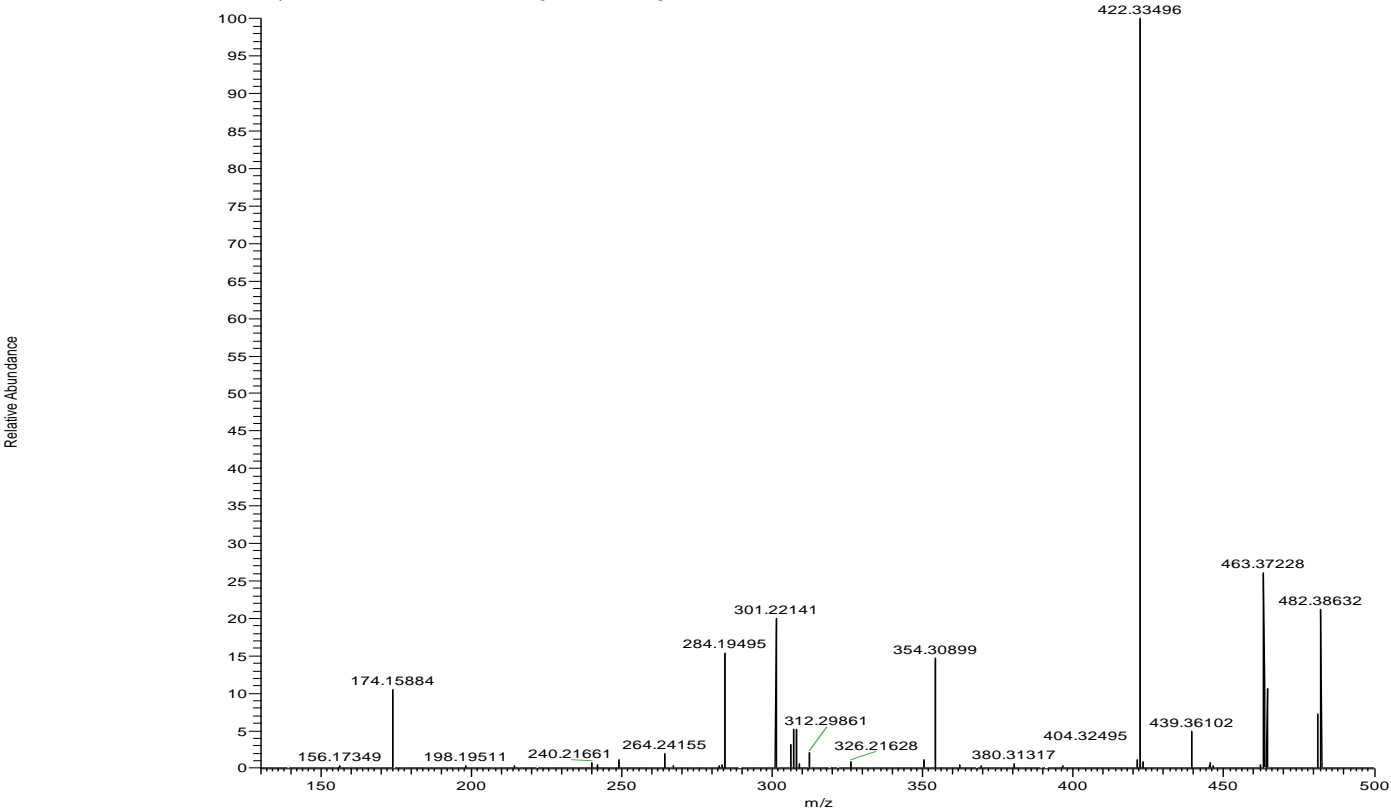

HRMS/MS spectrum of crambescin C1 (10)



OTH\_110708164747 #3 RT: 0.03 AV: 1 NL: 1.35E7  
T: FTMS + p ESI Full ms2 495.40@cid35.00 [135.00-500.40]

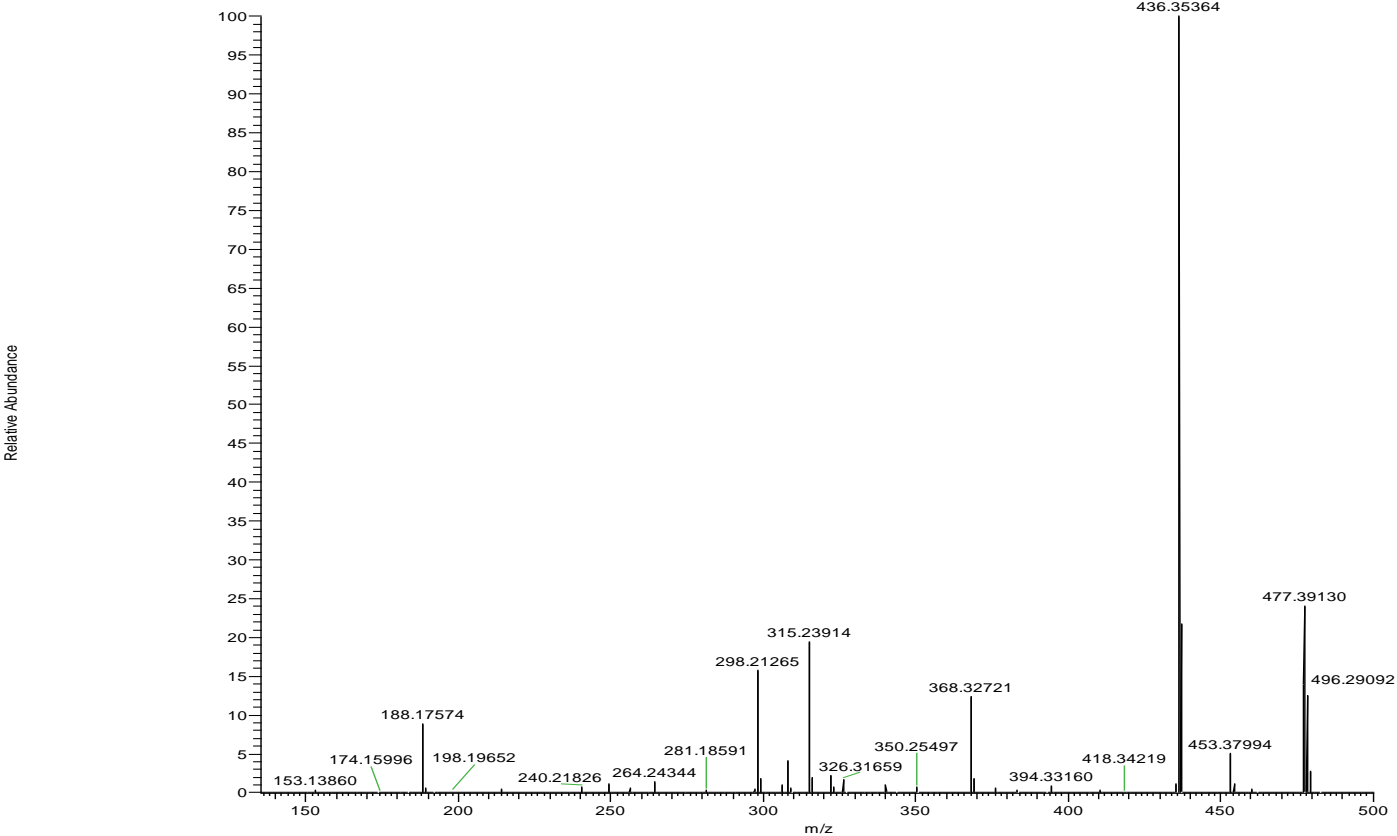

HRMS/MS spectrum of crambescin C1 (11)
